# Supplementary material for: Iodine-promoted one pot reaction of pyridin-2-amine with arylmethyl ketone and selenosulfonate: synthesis of 3-(alkylselanyl)-2-arylimidazo[1,2-a]pyridine under transition-metal free conditions
Source: Royal Society of Chemistry journal article supplement (doi:10.1039/c8qo01245h), 2019-01-01
Supplement: c8qo01245h1.pdf [file c8qo01245h1.pdf]

## Supporting Information

### **Iodine Promoted One Pot reaction of pyridin-2-amine with Arylmethyl Ketone and Selenosulfonate: Synthesis of 3-(Alkylselanyl)-2-arylimidazo[1,2-a]pyridine Under Transition-metal Free Conditions**

Nan Jiang,<sup>a</sup> Yi Fang,<sup>a</sup> Yue Fang,<sup>a,b,c</sup> Shun-Yi Wang<sup>a\*</sup> and Shun-Jun Ji<sup>a\*</sup>

<sup>a</sup>Key Laboratory of Organic Synthesis of Jiangsu Province, College of Chemistry, Chemical Engineering and Materials Science & Collaborative Innovation Center of Suzhou Nano Science and Technology, Soochow University, Suzhou, 215123, P. R. China. <sup>b</sup>School of Pharmacy, Yancheng Teachers University, Yancheng, 224051, China <sup>c</sup>College of Chemical Engineering, Nanjing University of Technology, Nanjing, 210009, China.

Fax : (+86)-512-65880307; phone: (+86)- 512-65880307; E-mail: shunyi@suda.edu.cn; shunjun@suda.edu.cn

## Table of Contents

|                                                                            |               |
|----------------------------------------------------------------------------|---------------|
| <b>Experimental Section.....</b>                                           | <b>S2</b>     |
| <b>The <sup>1</sup>H and <sup>13</sup>C spectra of compounds 4a-t.....</b> | <b>S3-S22</b> |
| <b>Detail information of the purchased supplier of reagents.....</b>       | <b>S23</b>    |

## Experimental Section

### General

Melting points were recorded on an Electrothermal digital melting point apparatus and were uncorrected. IR spectra were recorded on a BRUKER VERTEX 70 spectrophotometer.  $^1\text{H}$  NMR and  $^{13}\text{C}$  NMR spectra were recorded on a BRUKER 400 MHz ( $^1\text{H}$  NMR) and 100 MHz ( $^{13}\text{C}$  NMR) spectrometer using  $\text{CDCl}_3$  or  $\text{DMSO-}d_6$  as solvent and TMS as internal standard. High resolution mass spectra were obtained using BRUKER micrOTOF-Q III instrument with ESI source.

The  $^1\text{H}$  and  $^{13}\text{C}$  spectra of compounds: 4a:

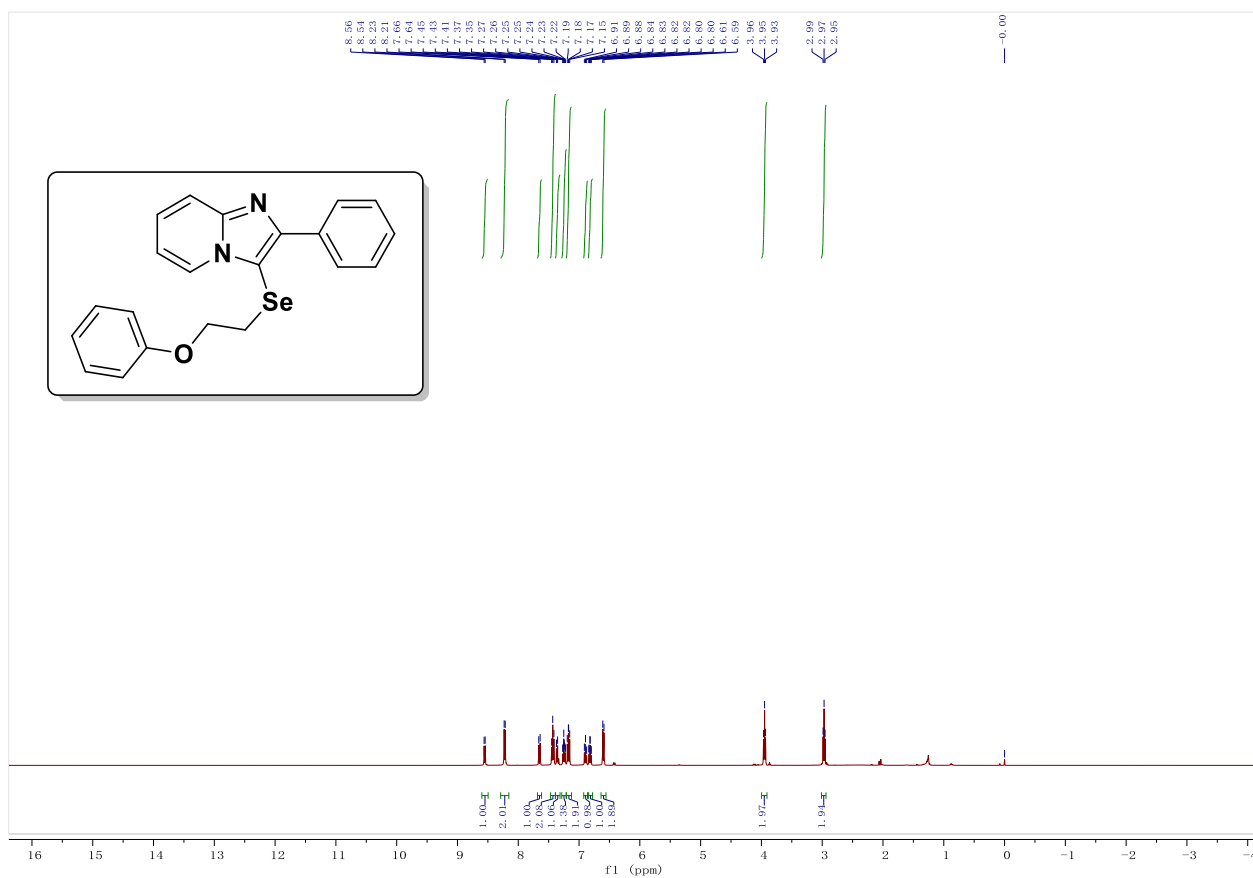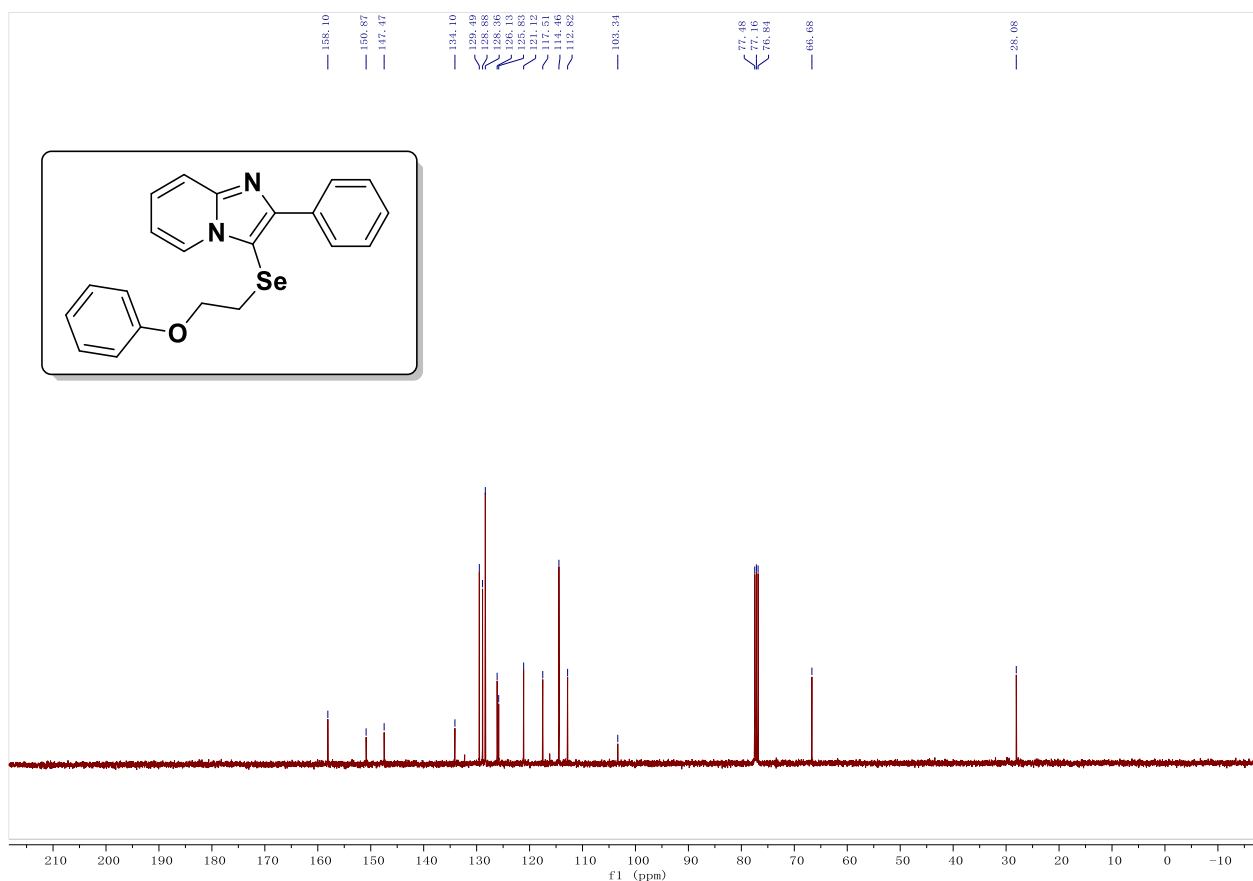

4b:

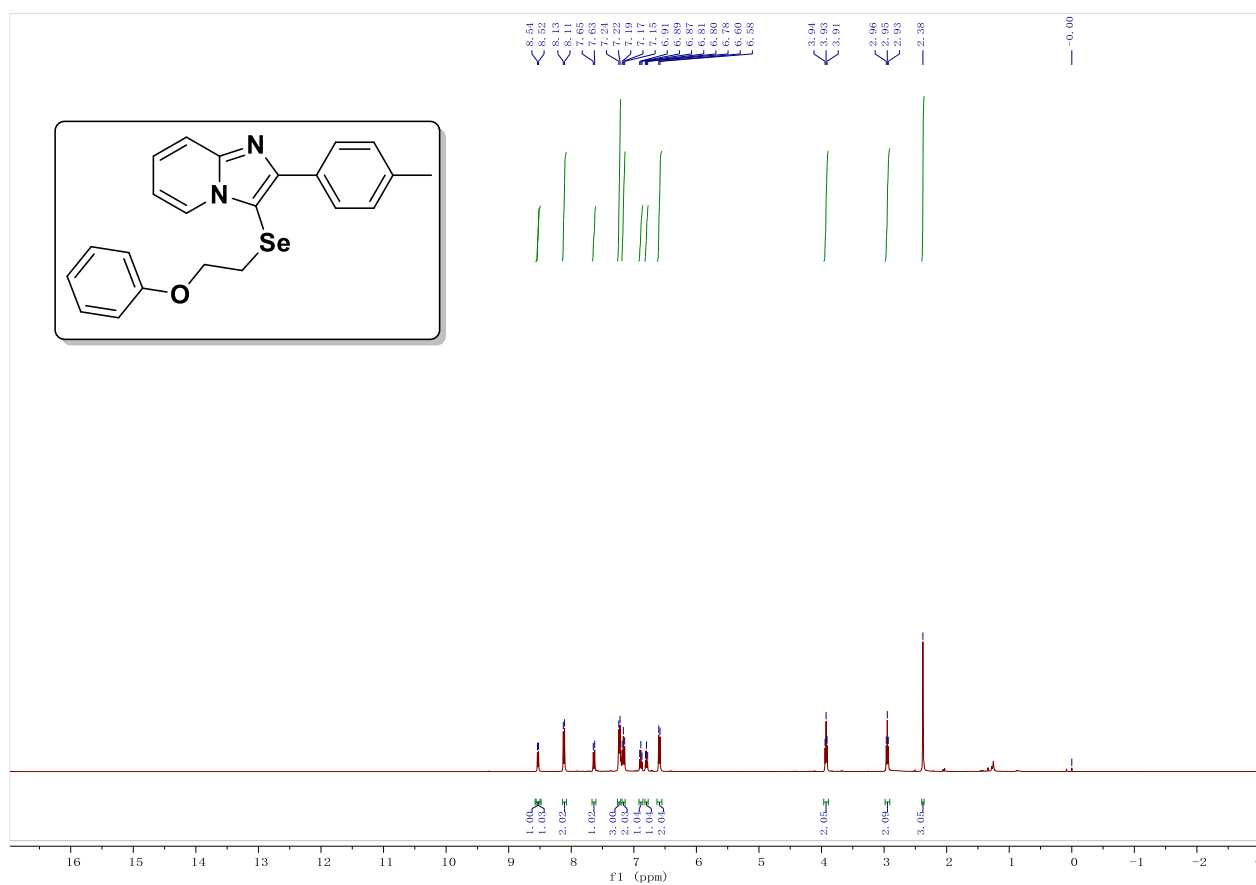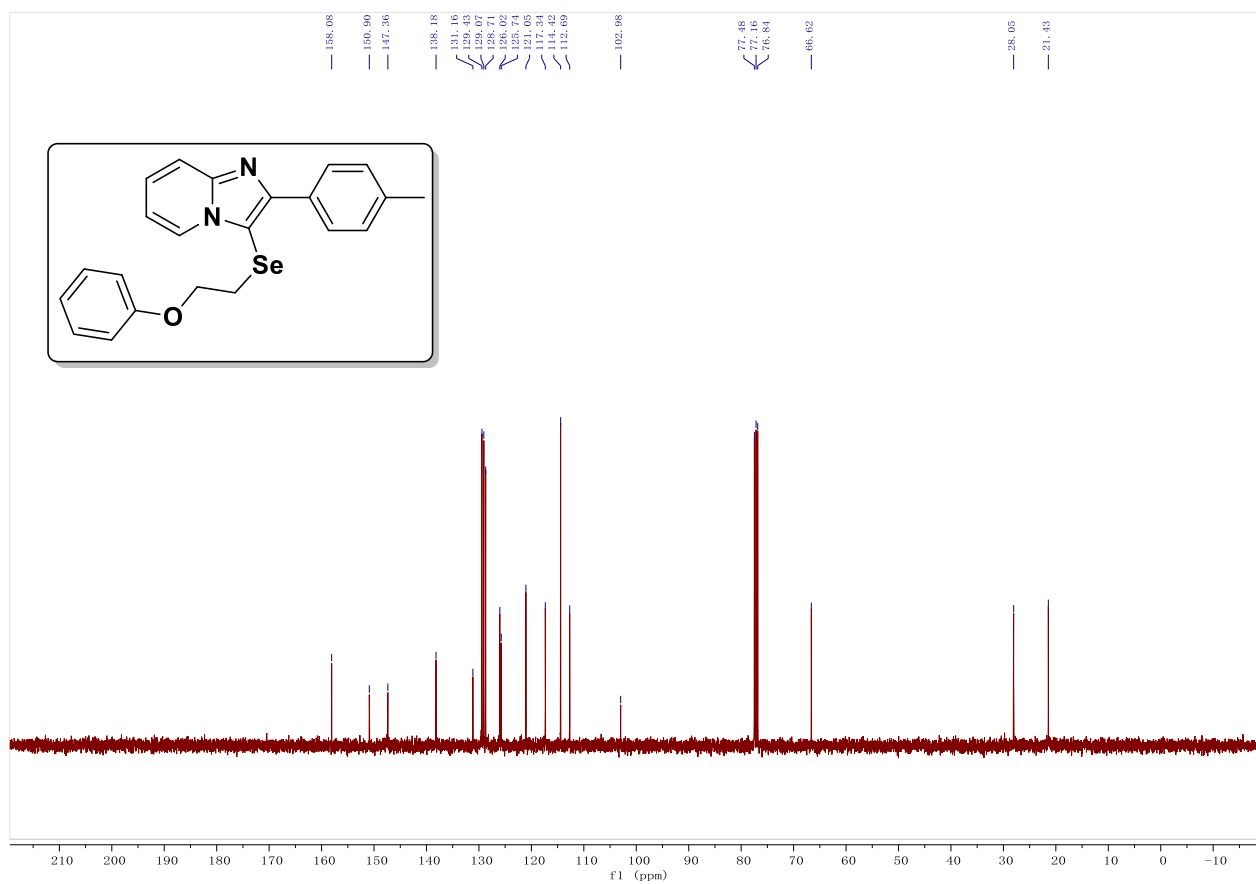

4c:

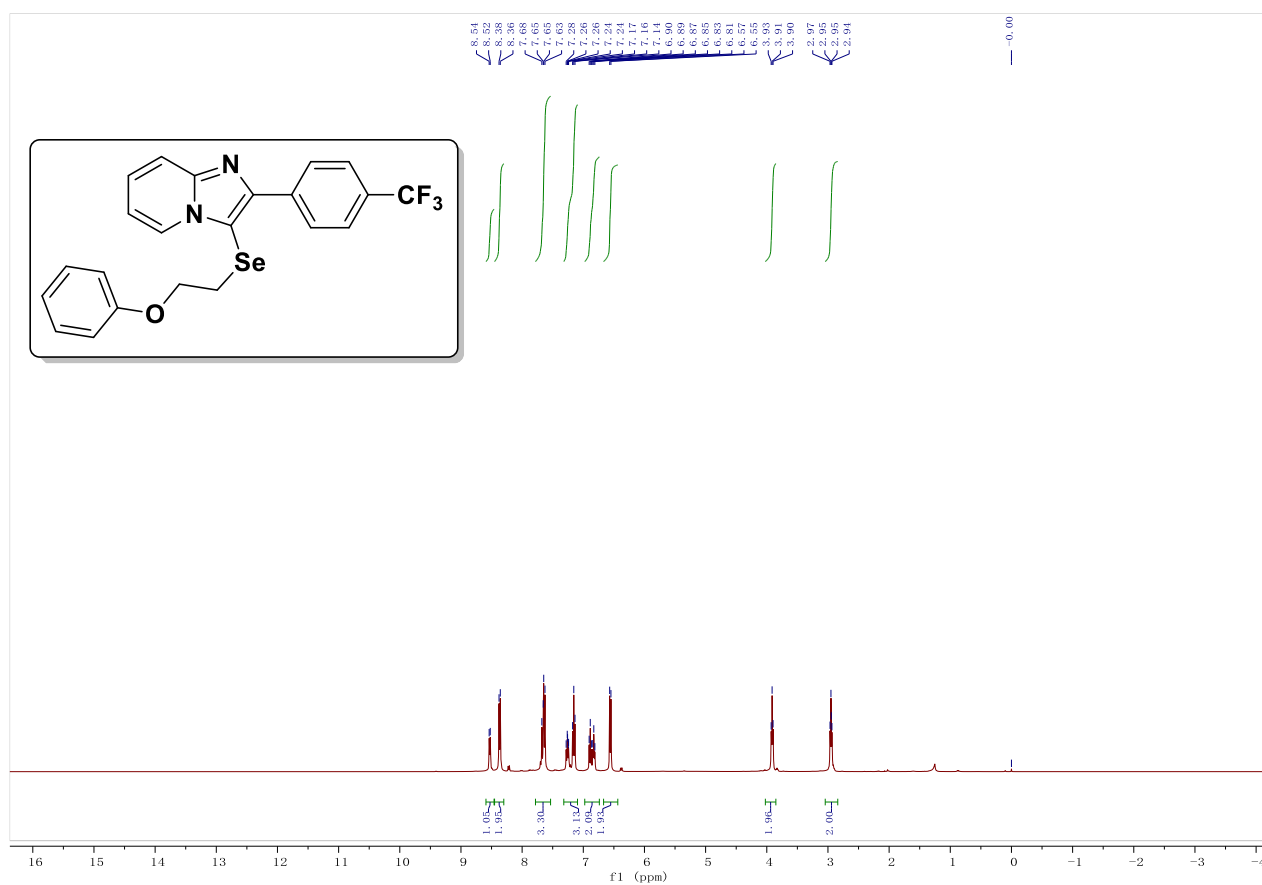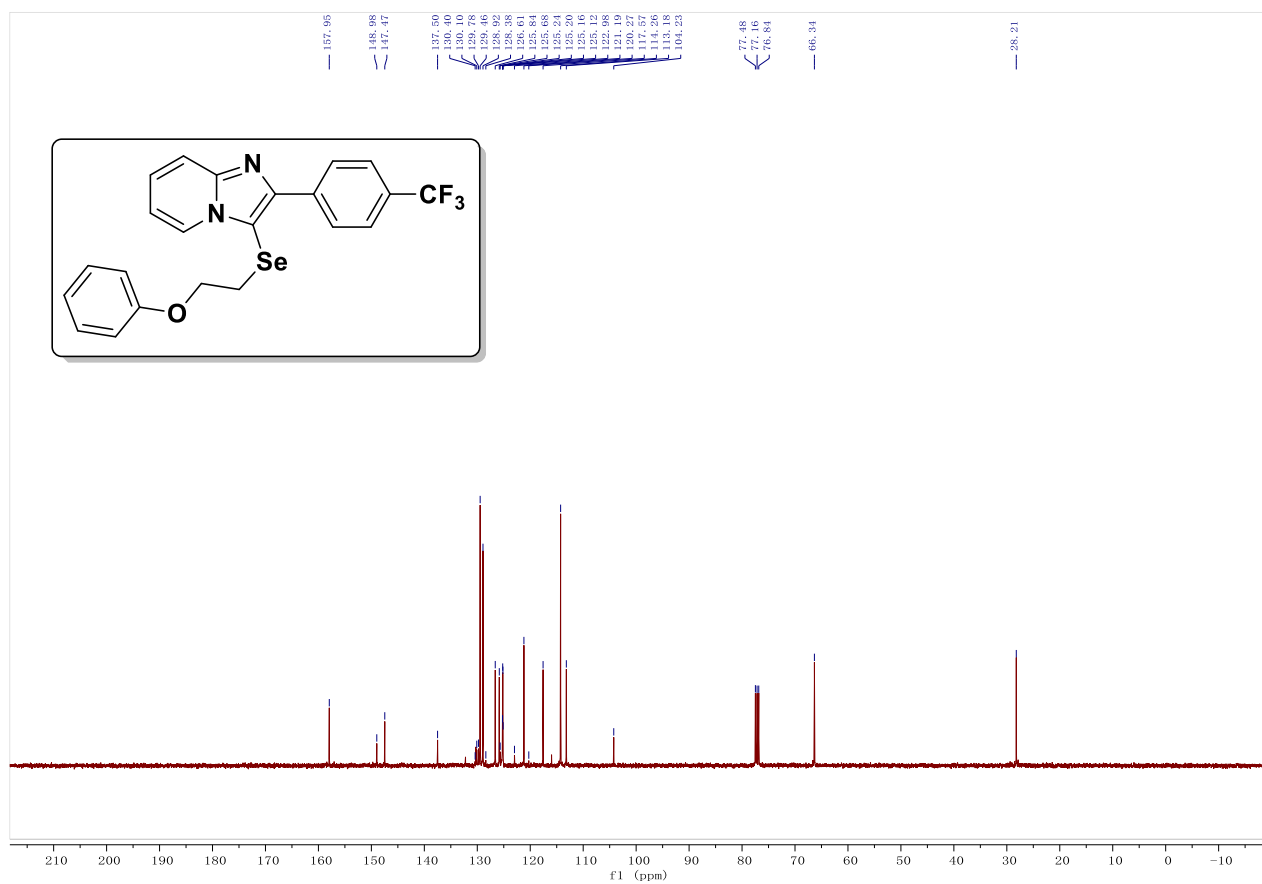

4d:

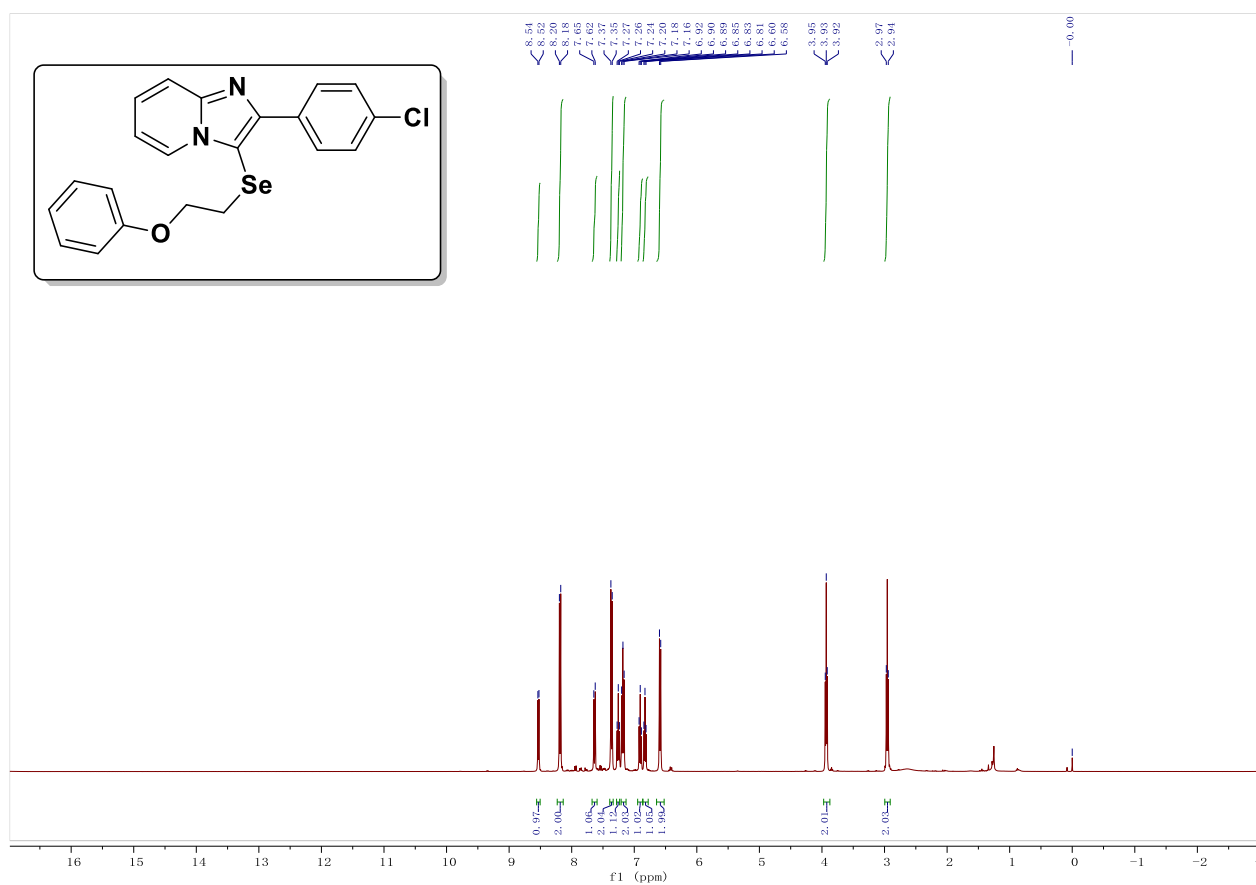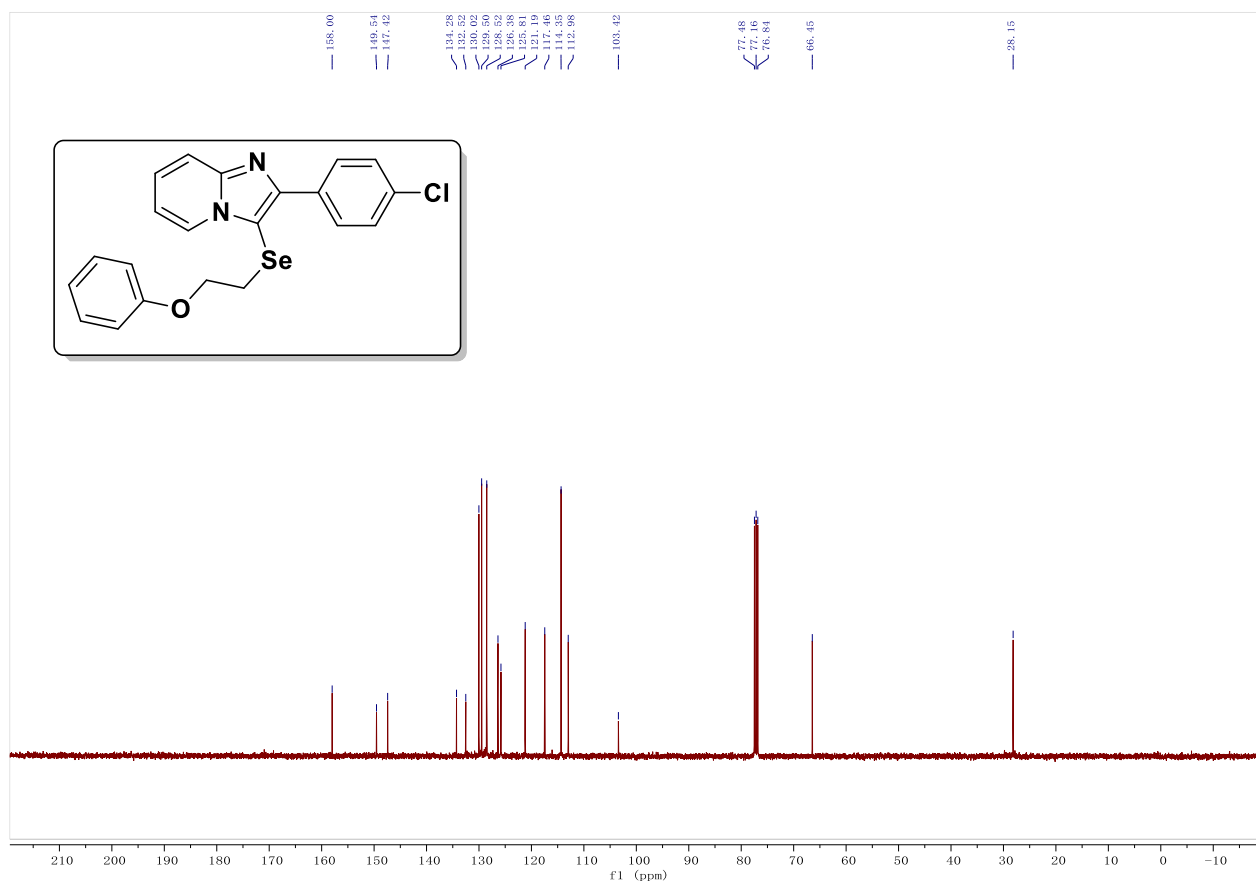

4e:

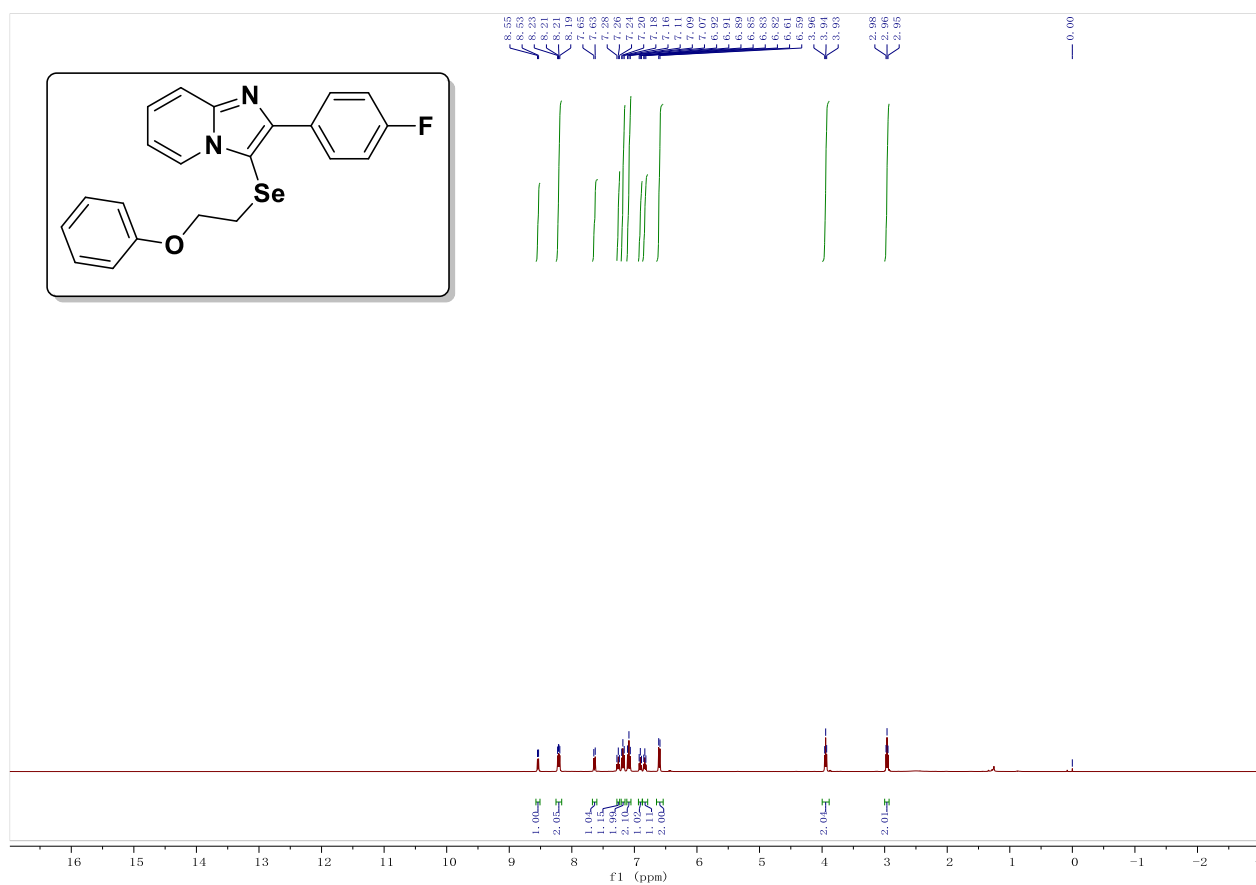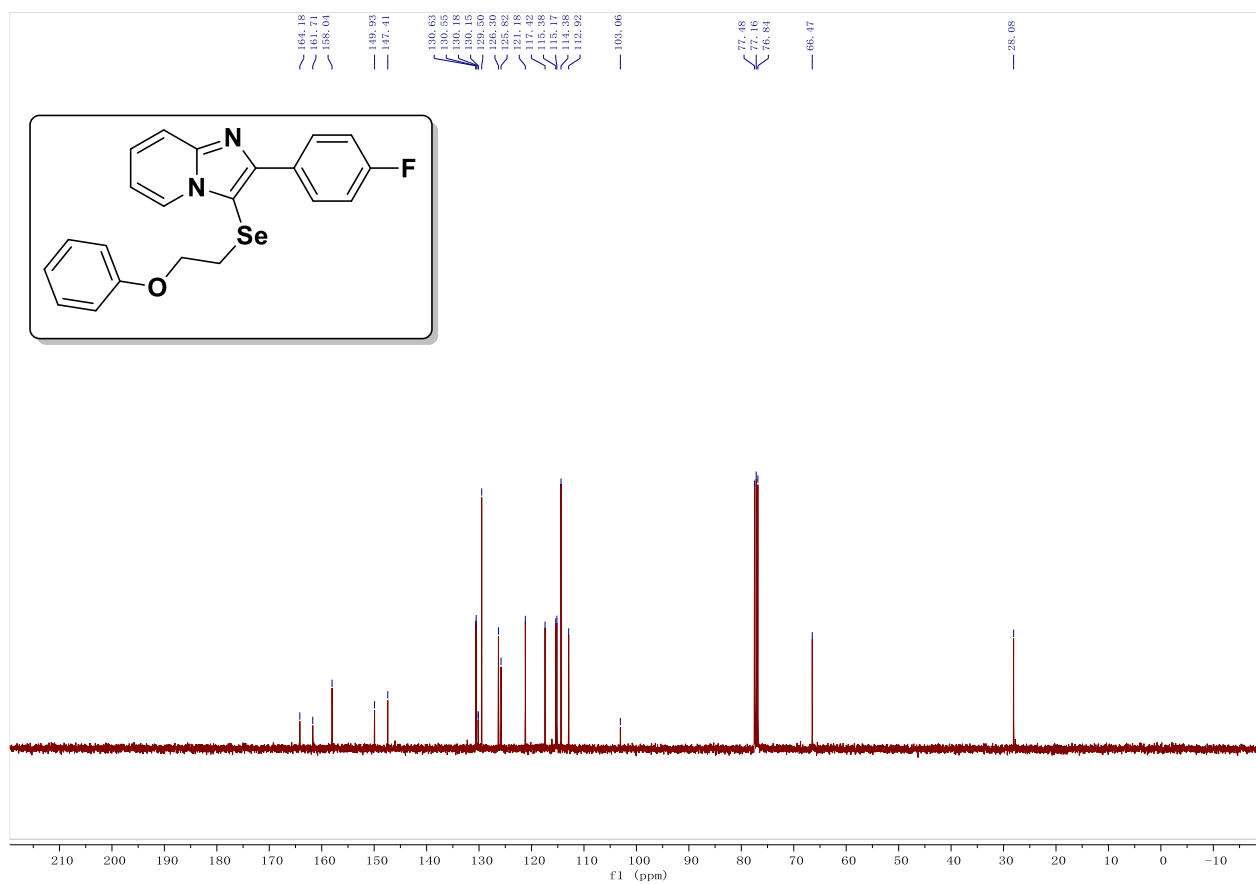

4f:

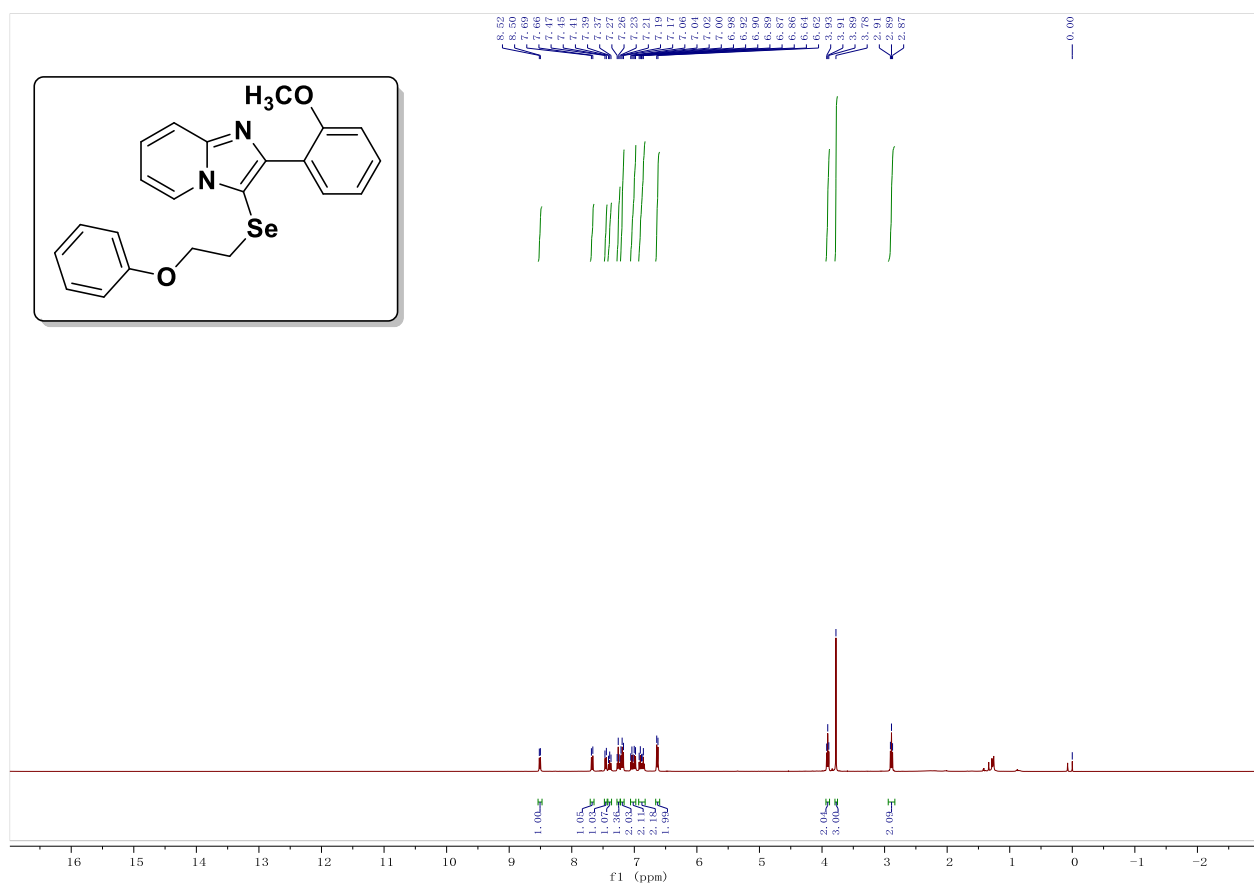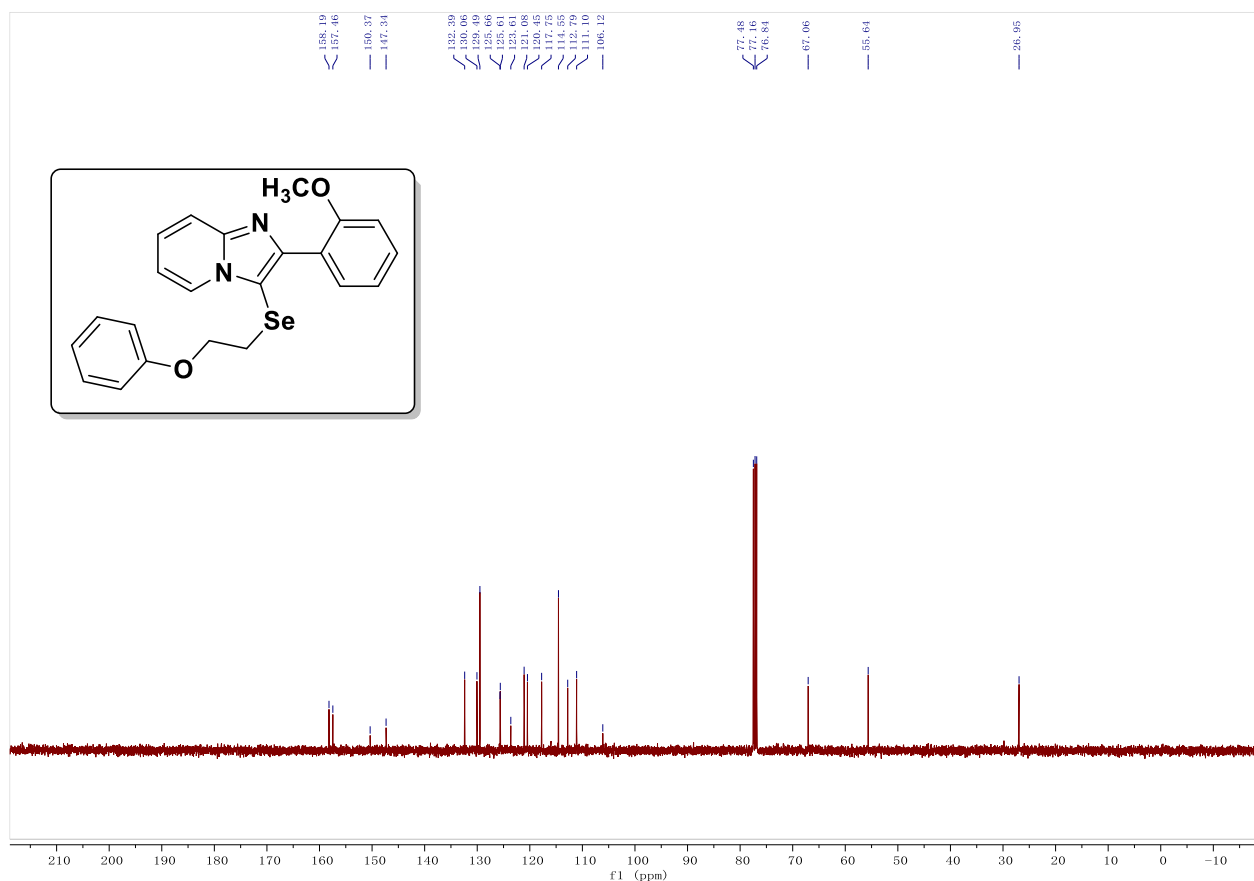



4g:

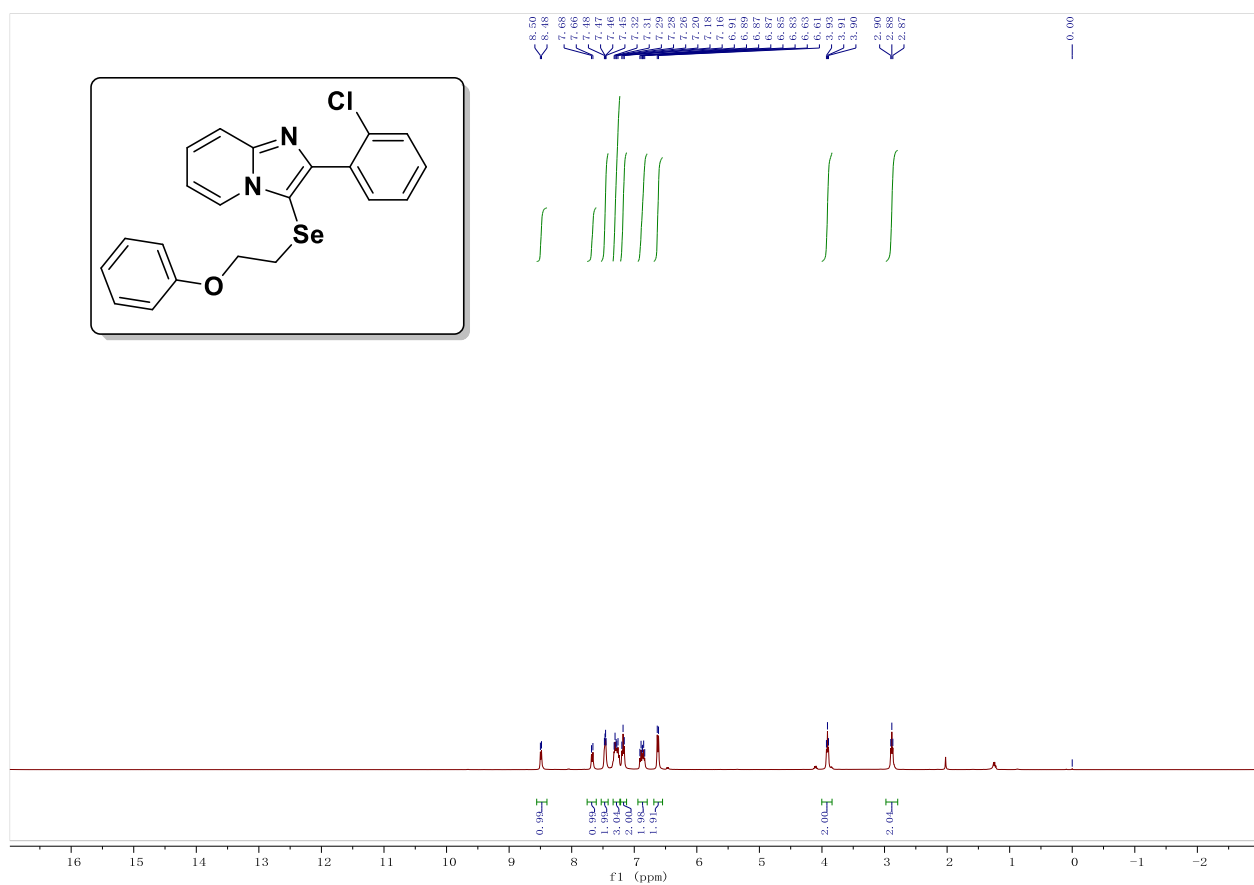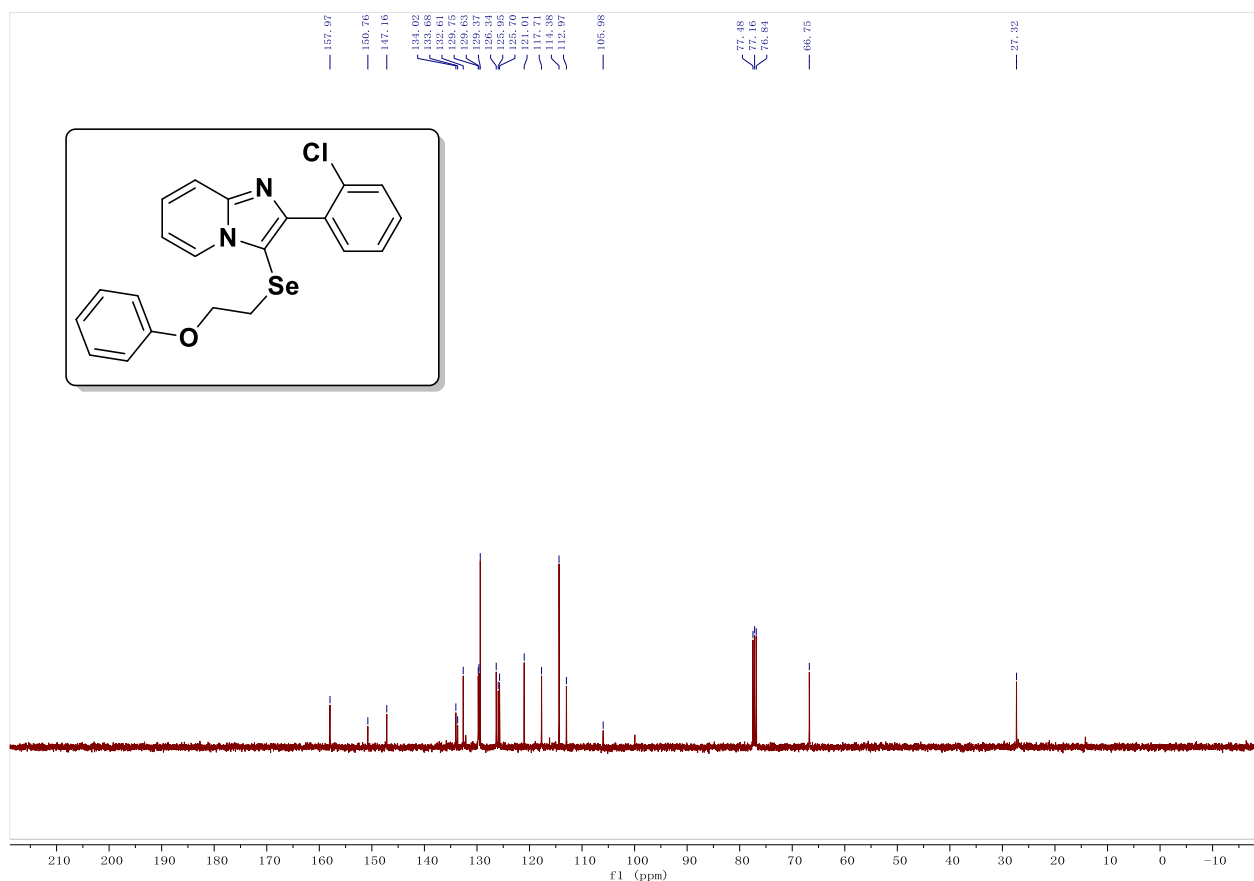

4h:

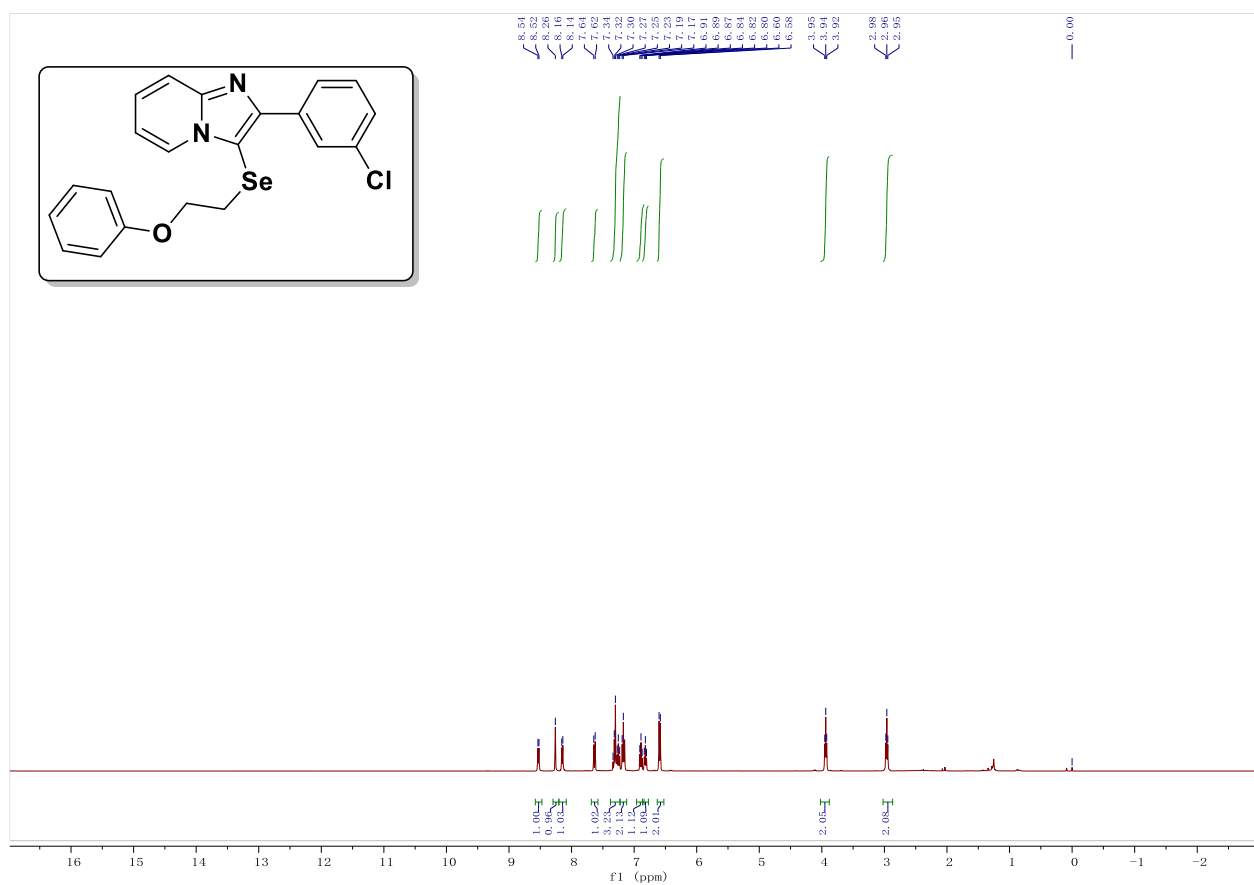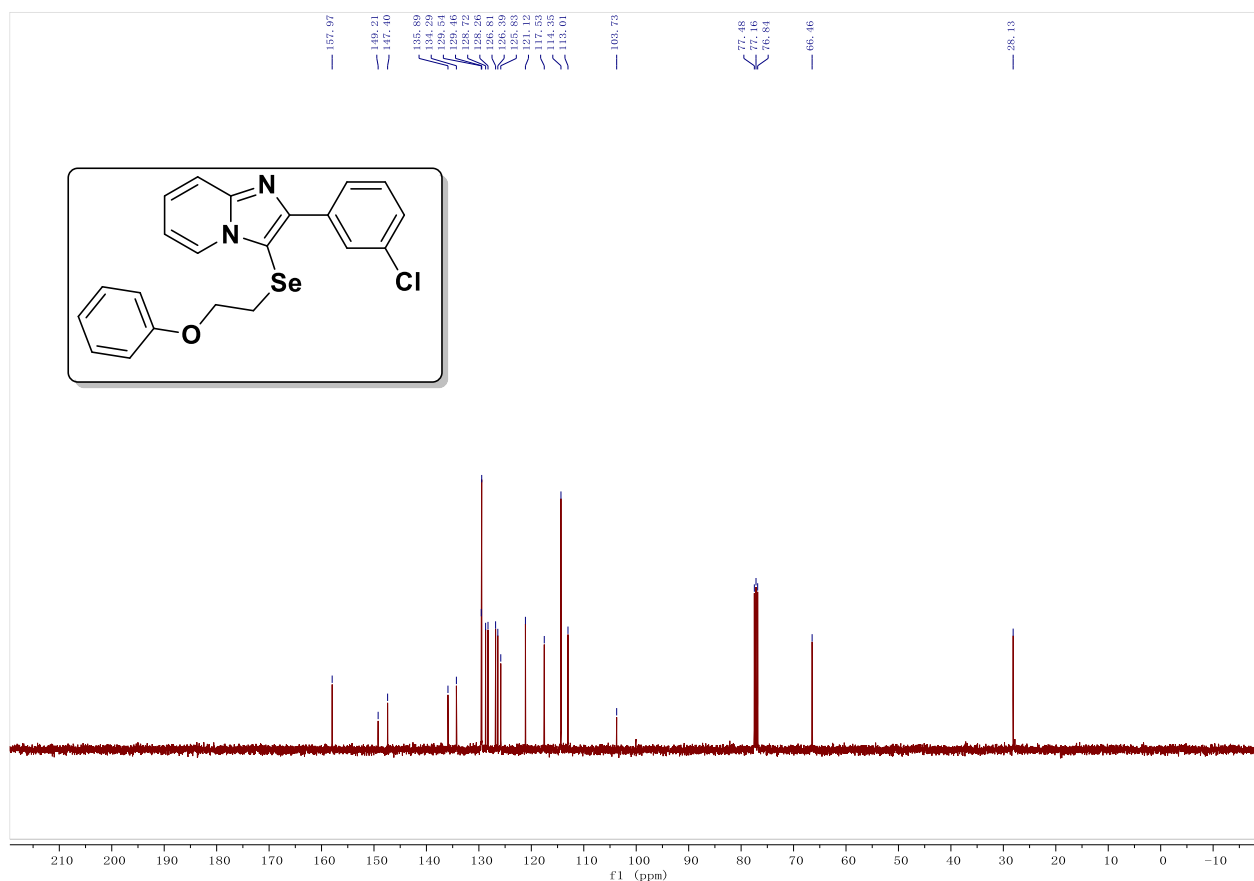

4i:

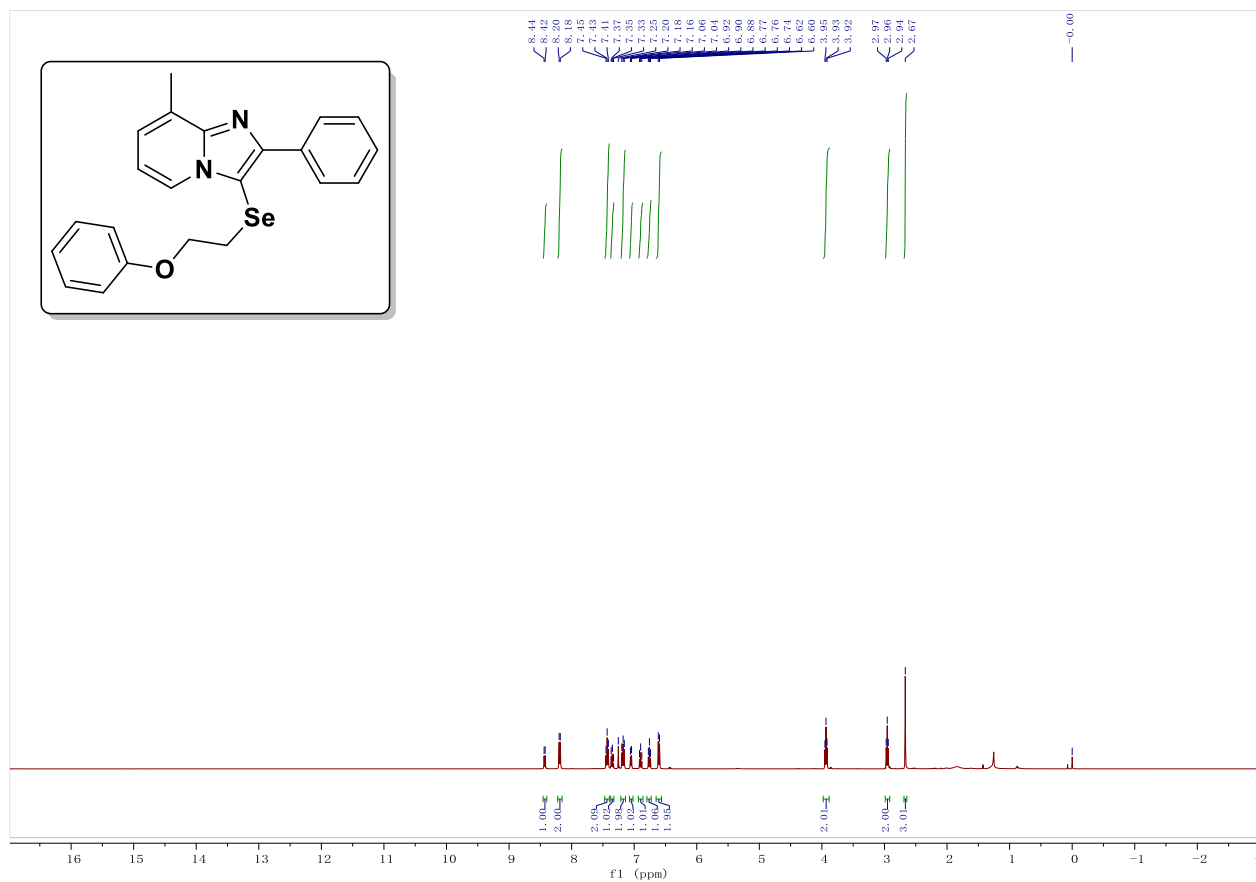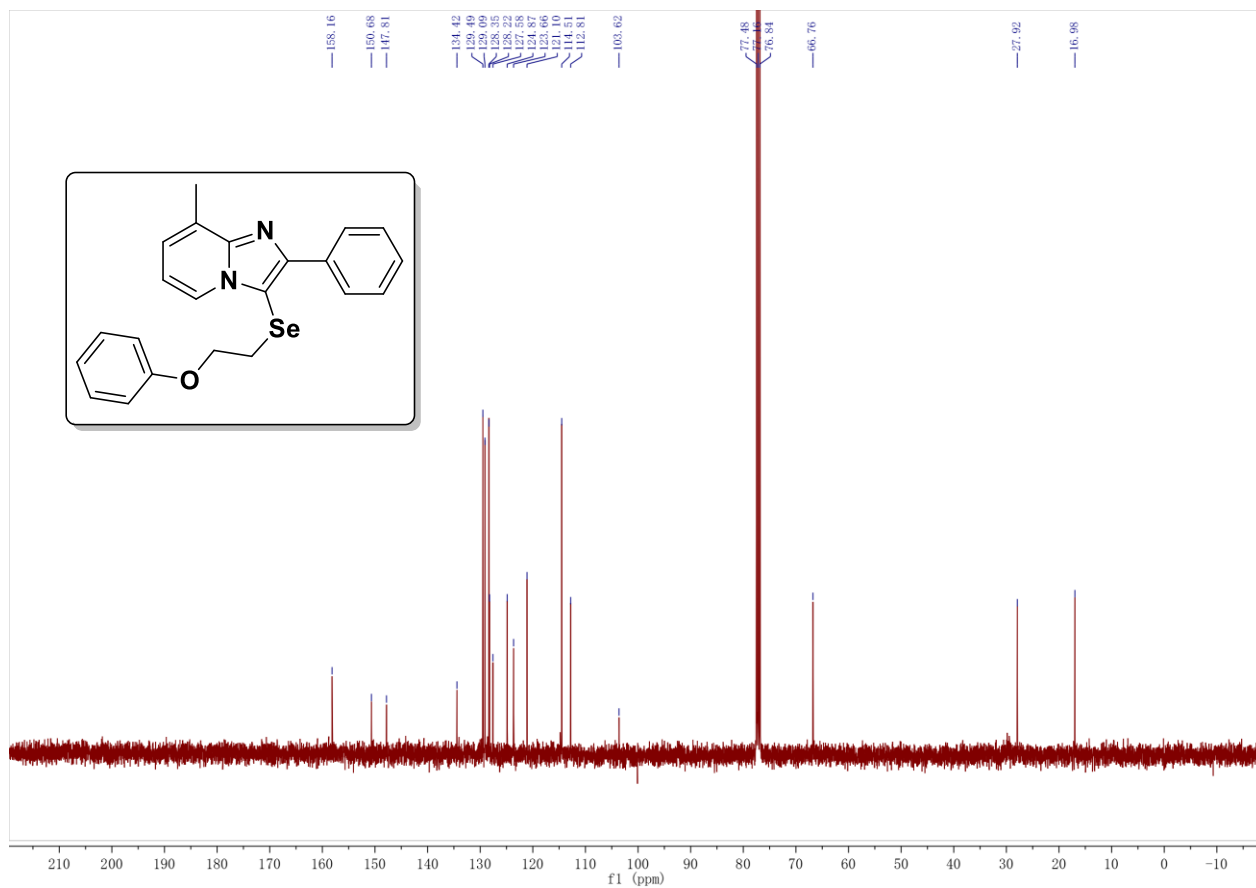

4j:

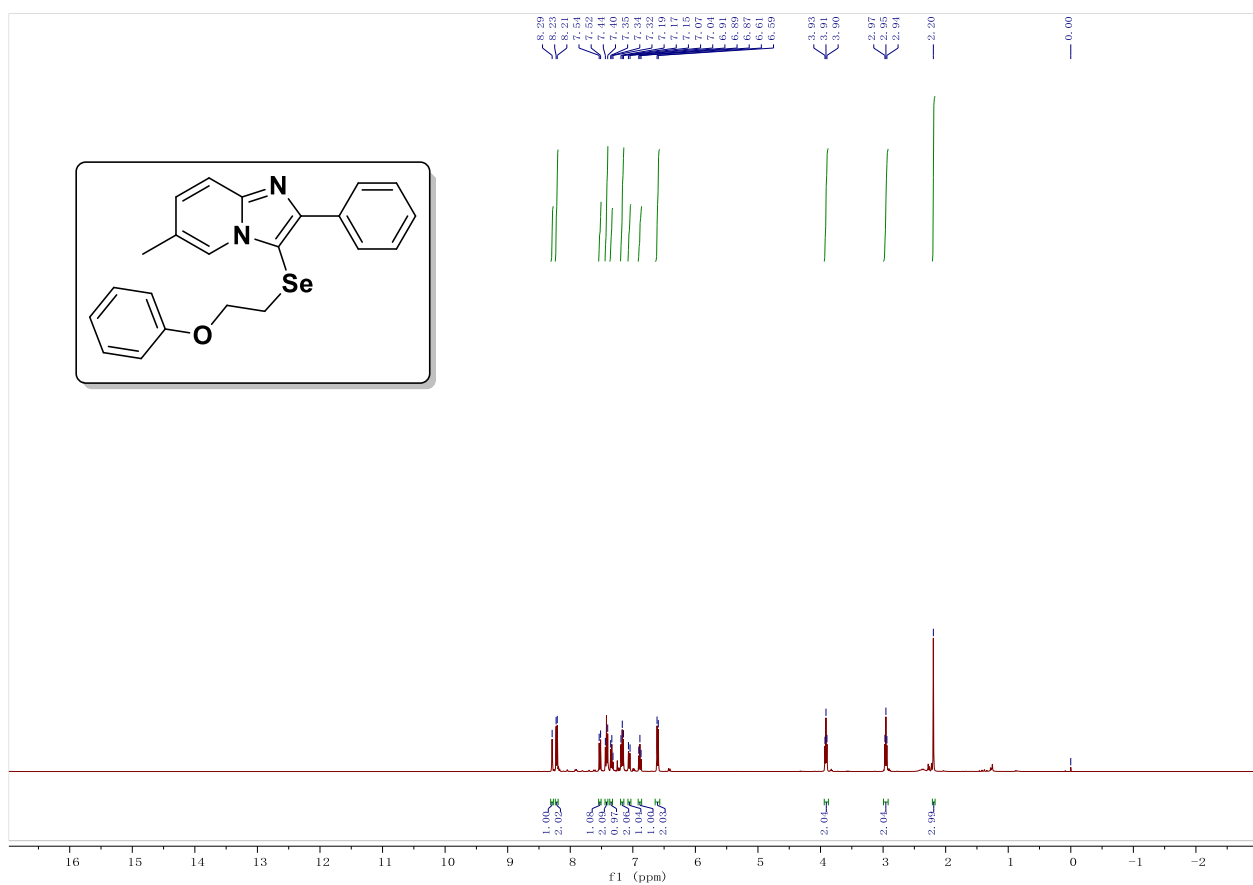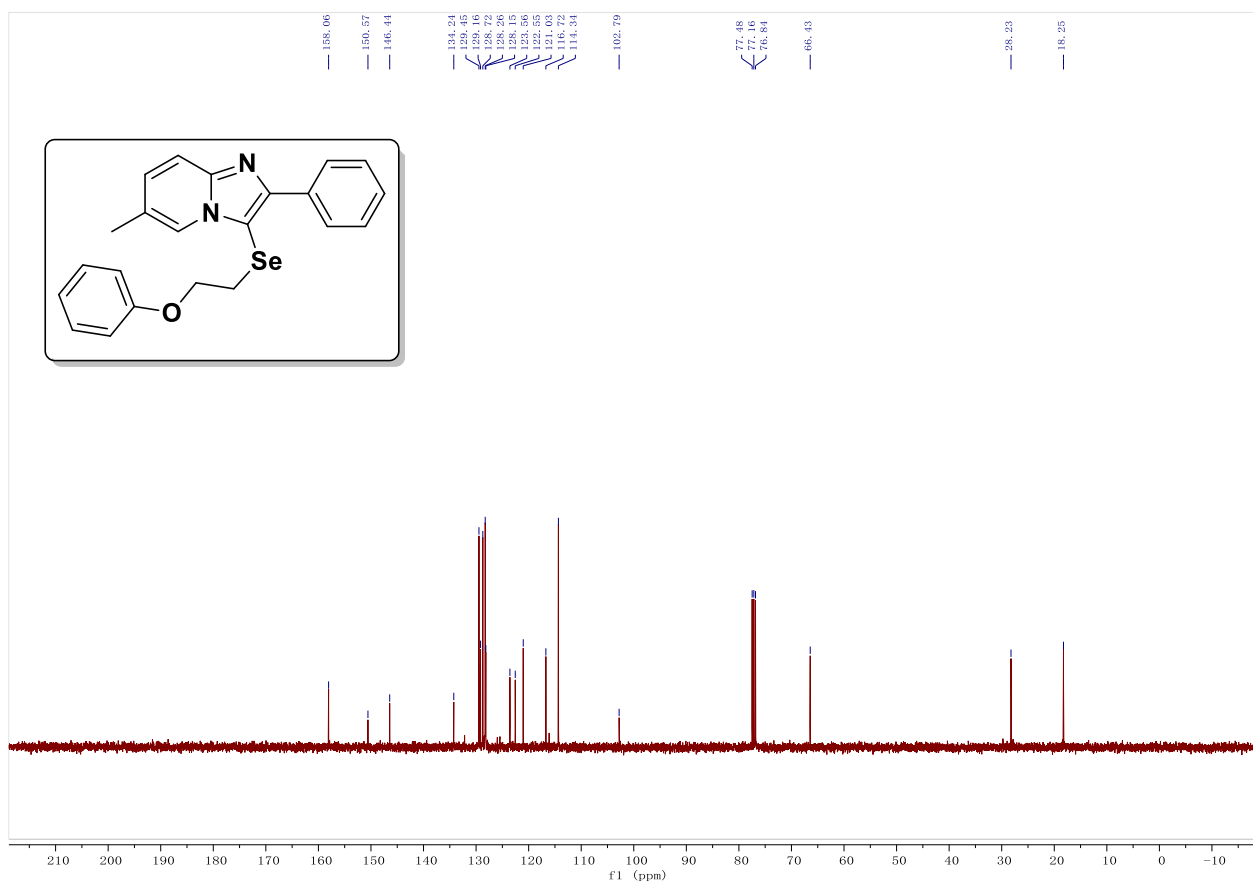

4k:

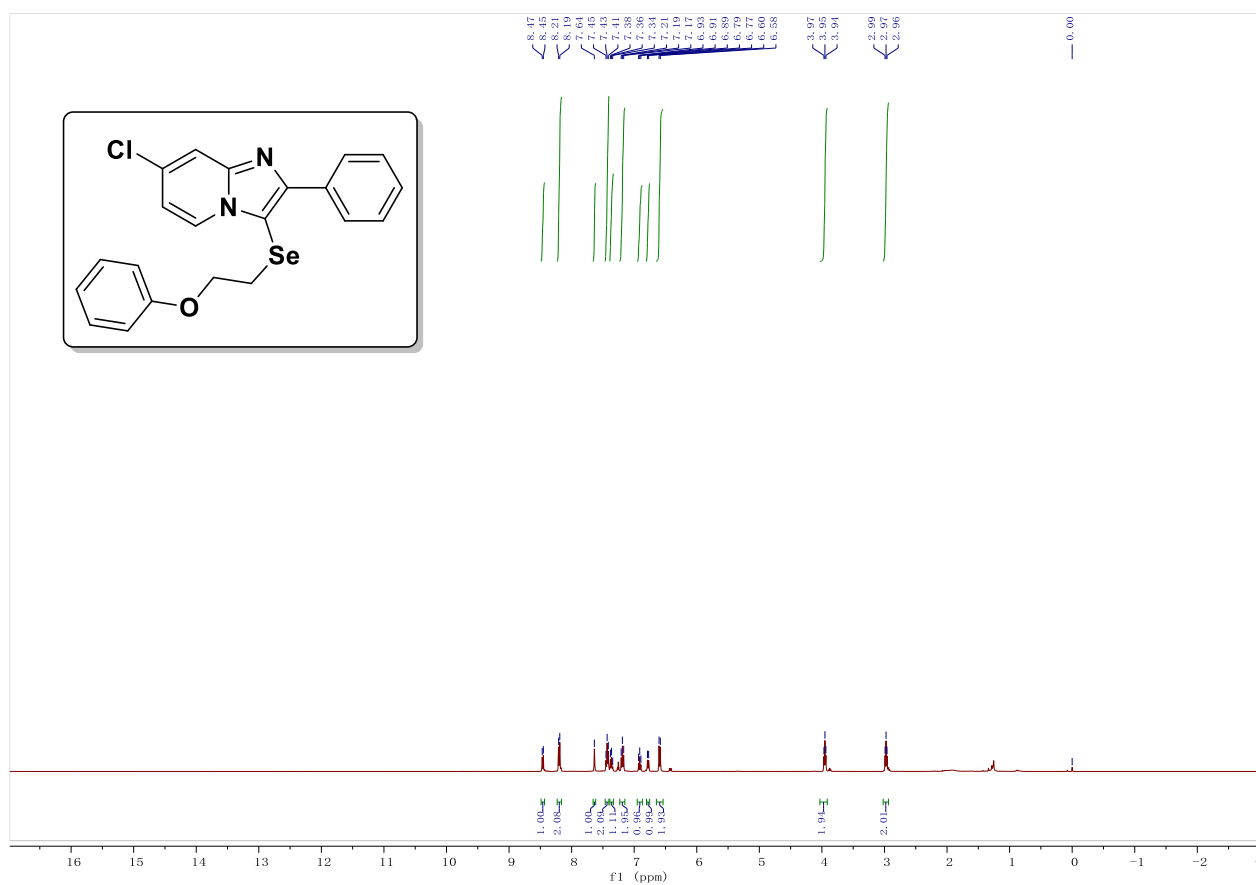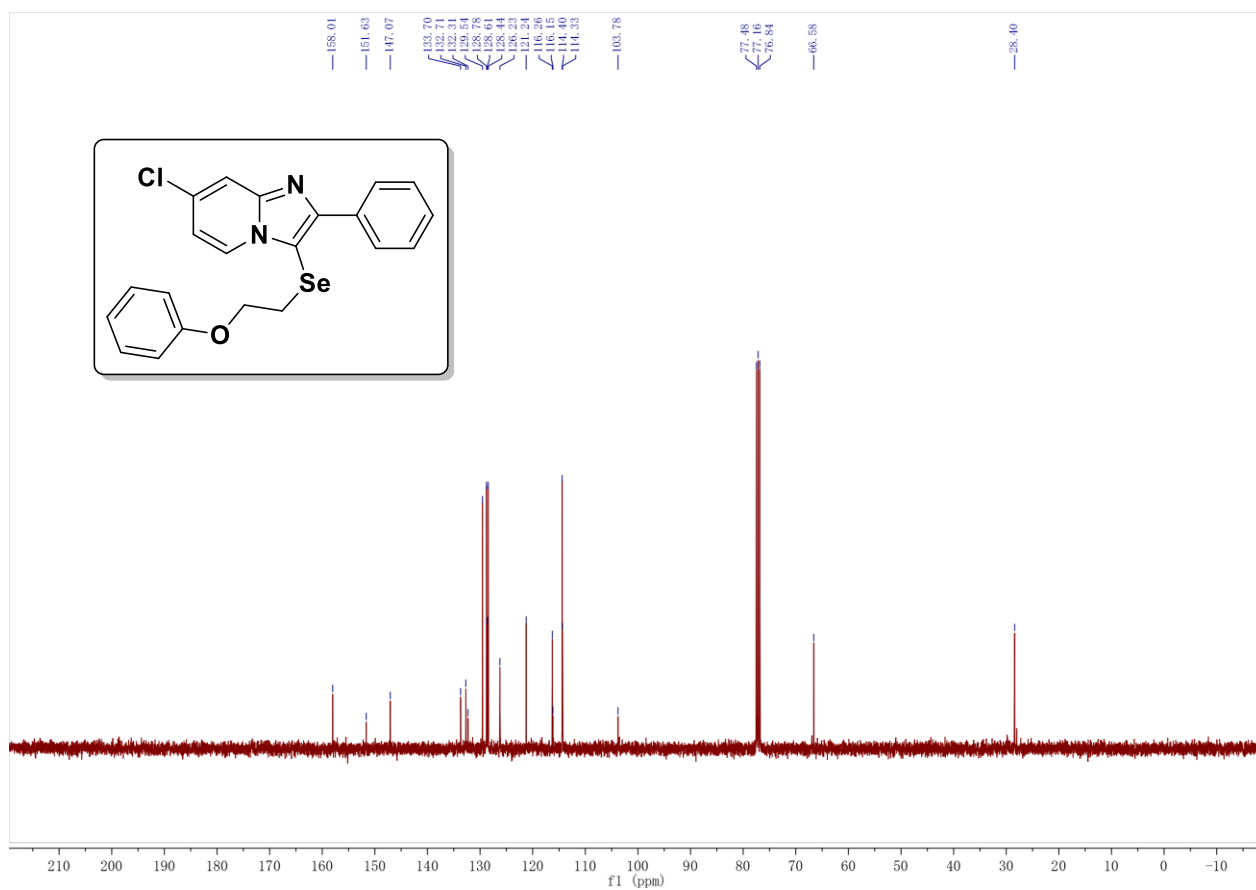

4l:

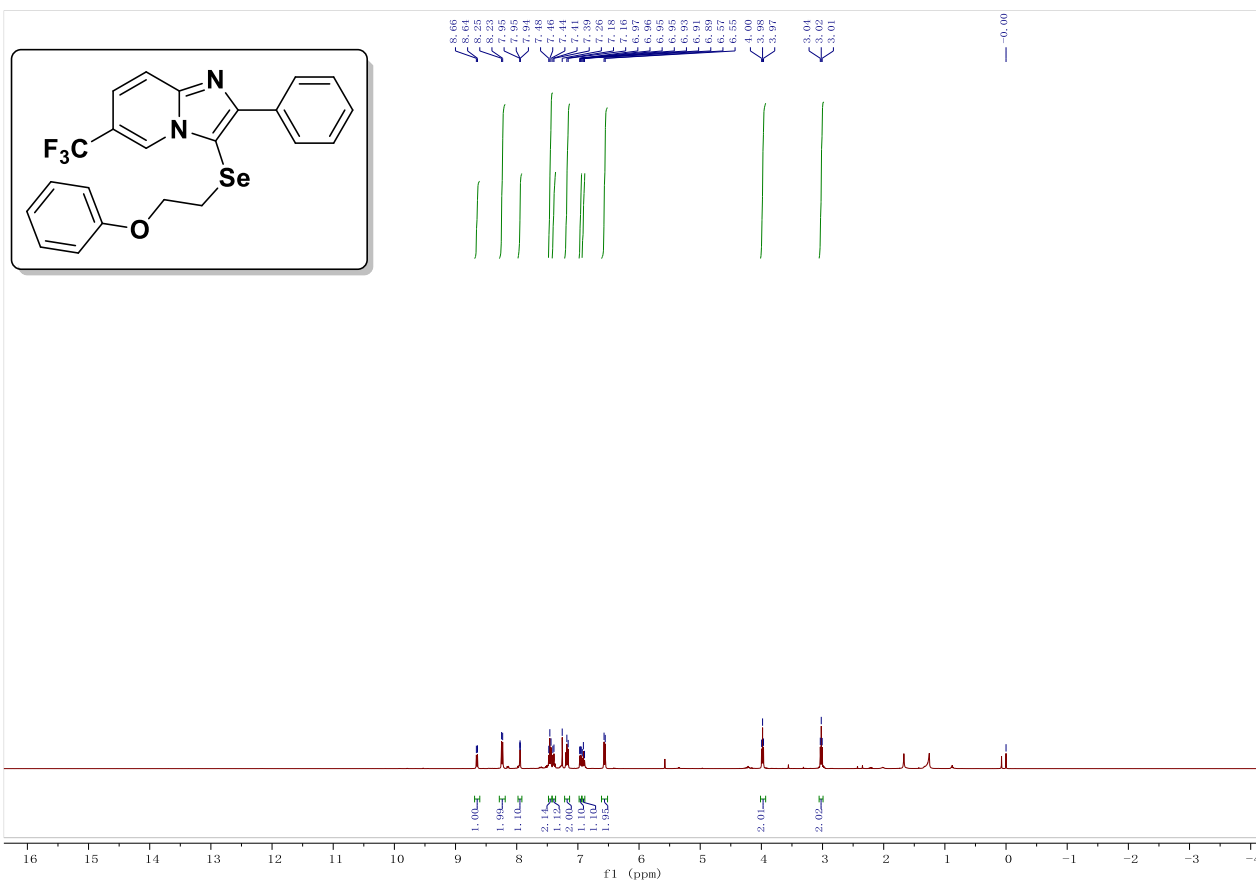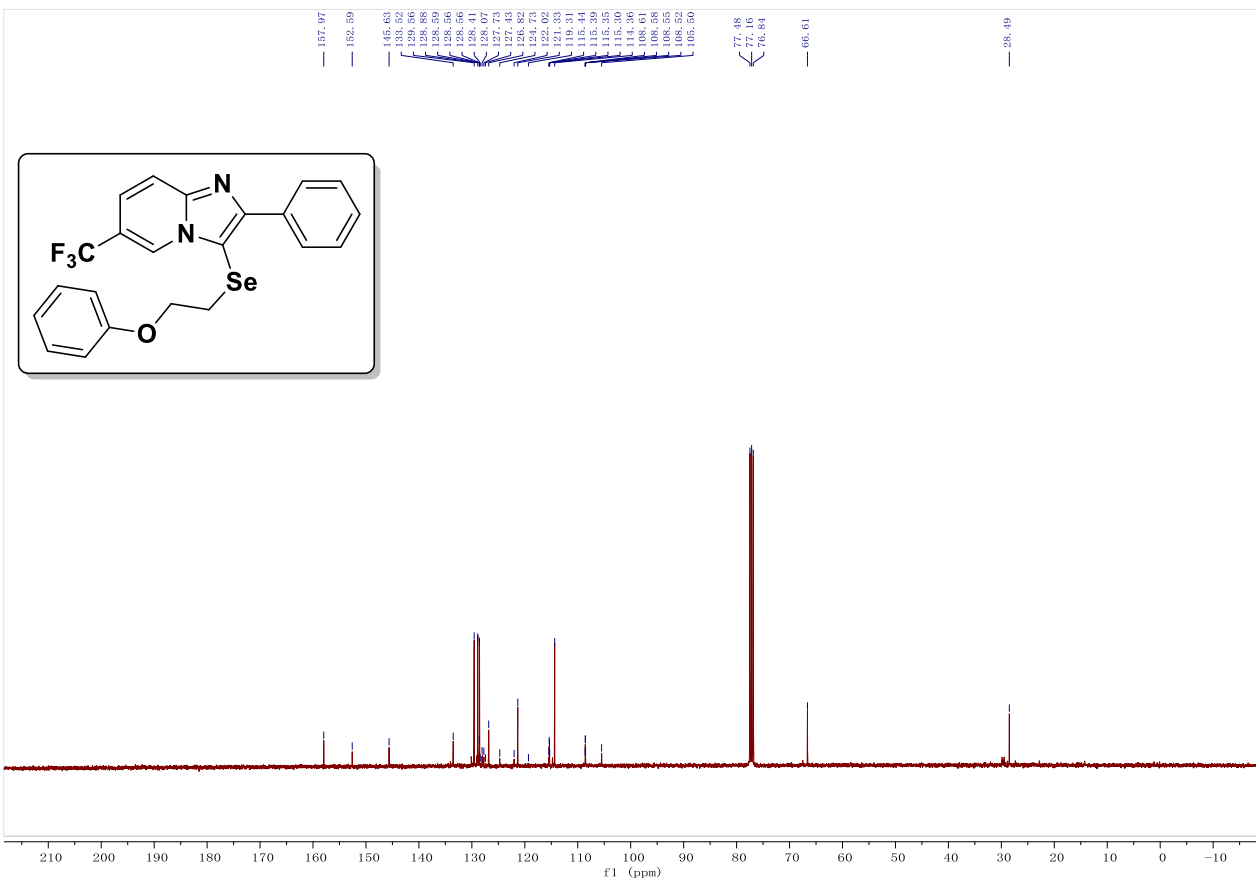

4m:

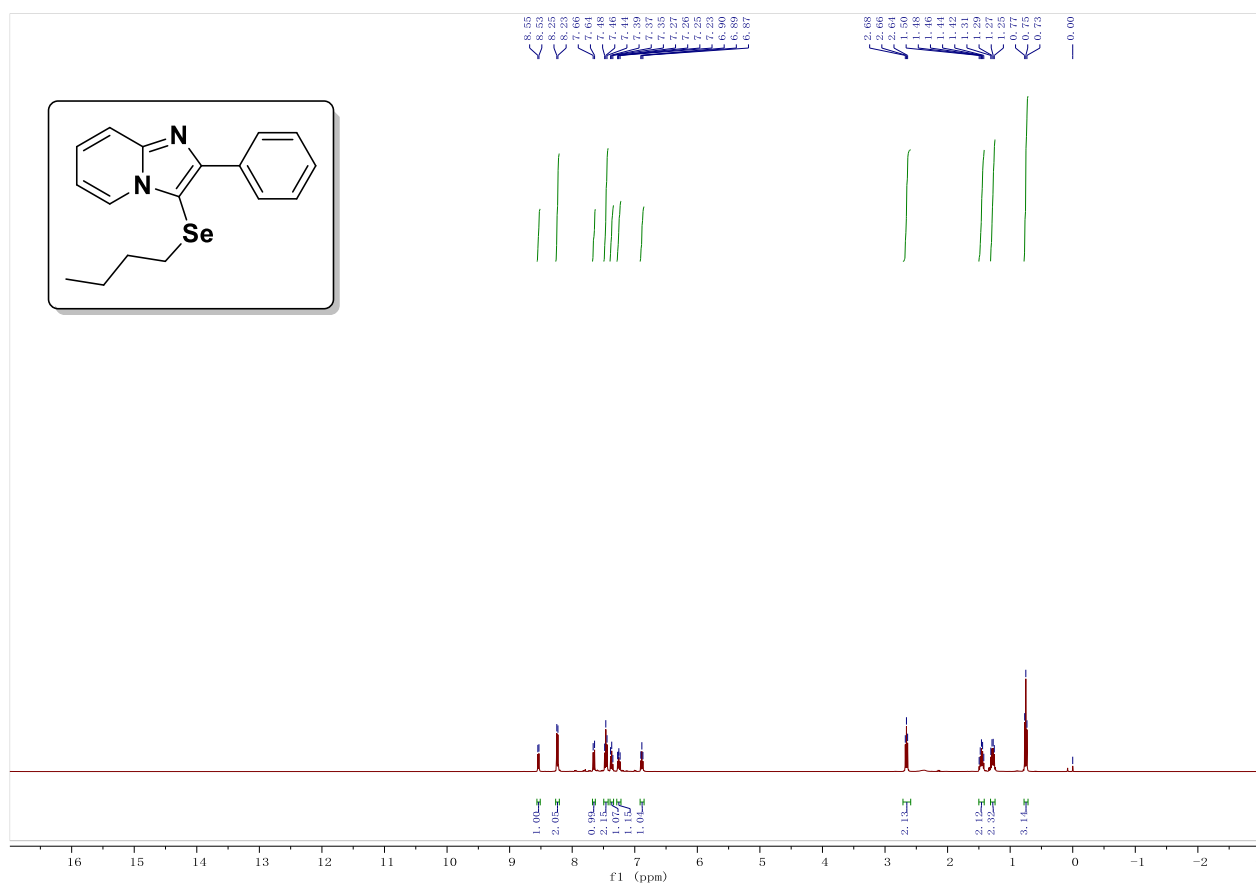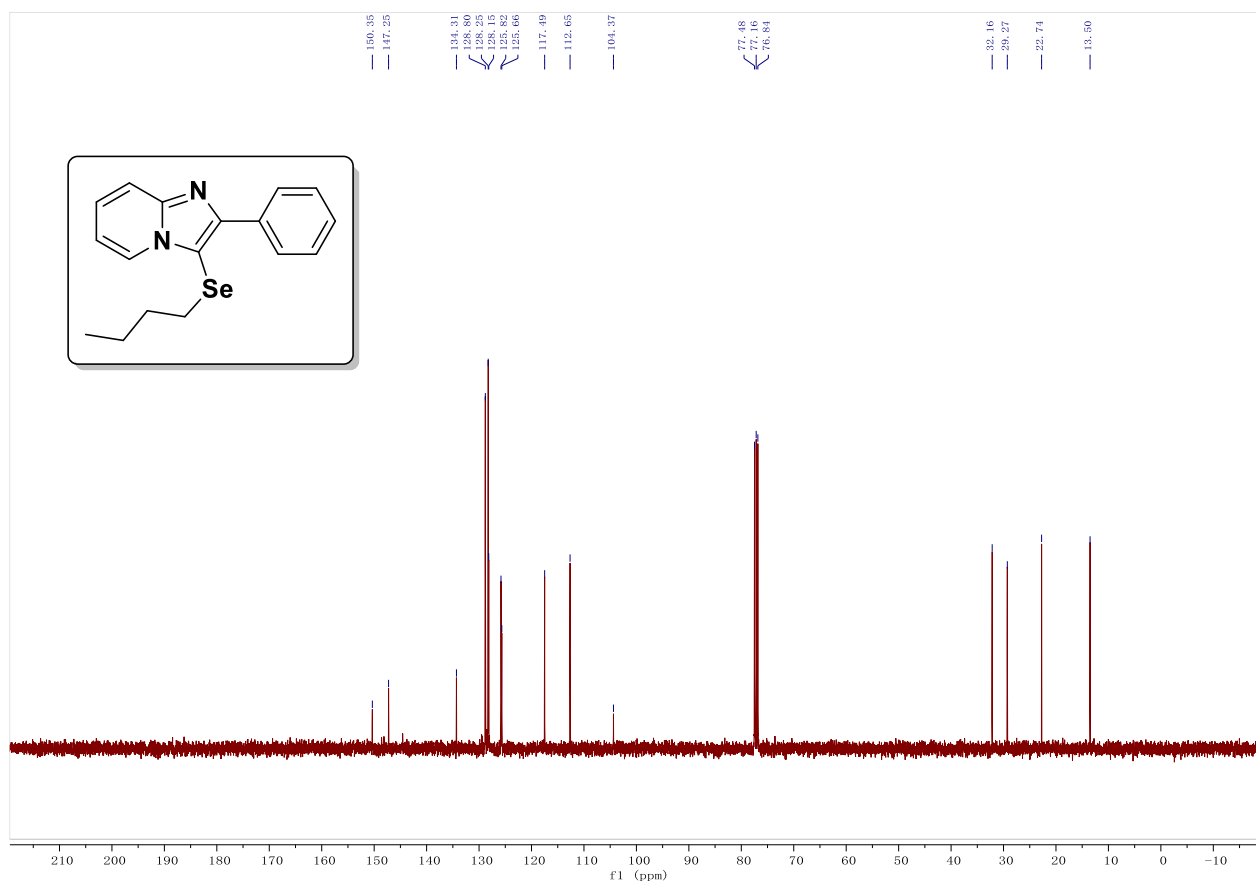

4n:

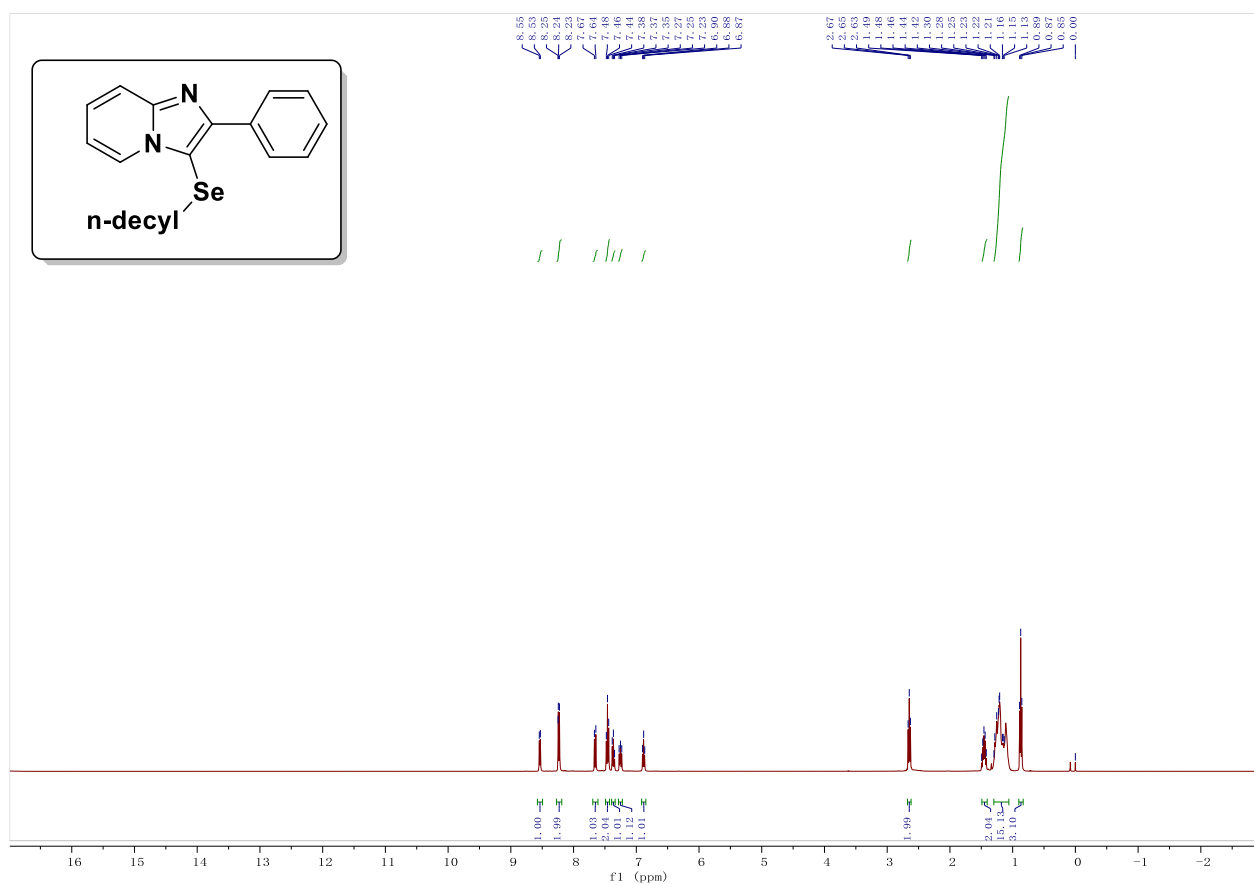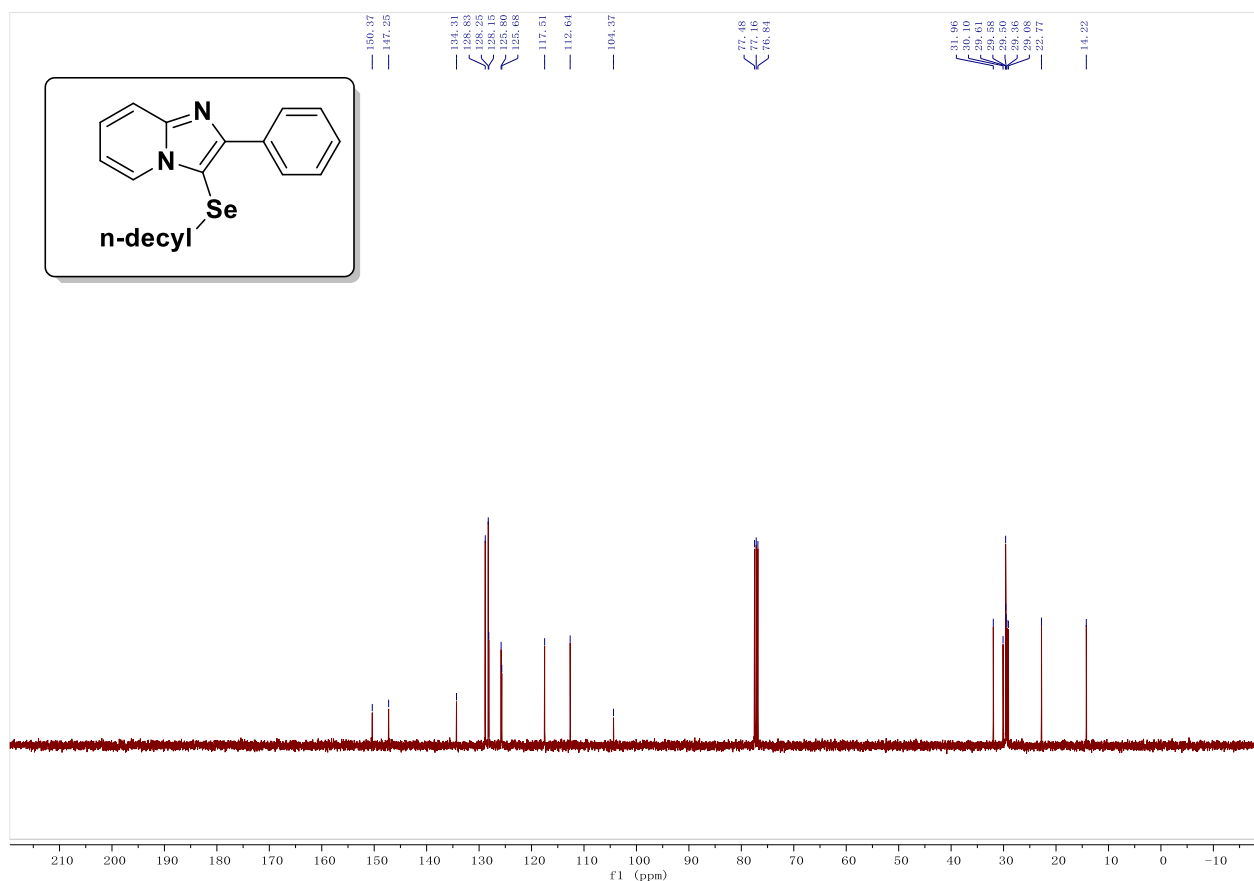



40:

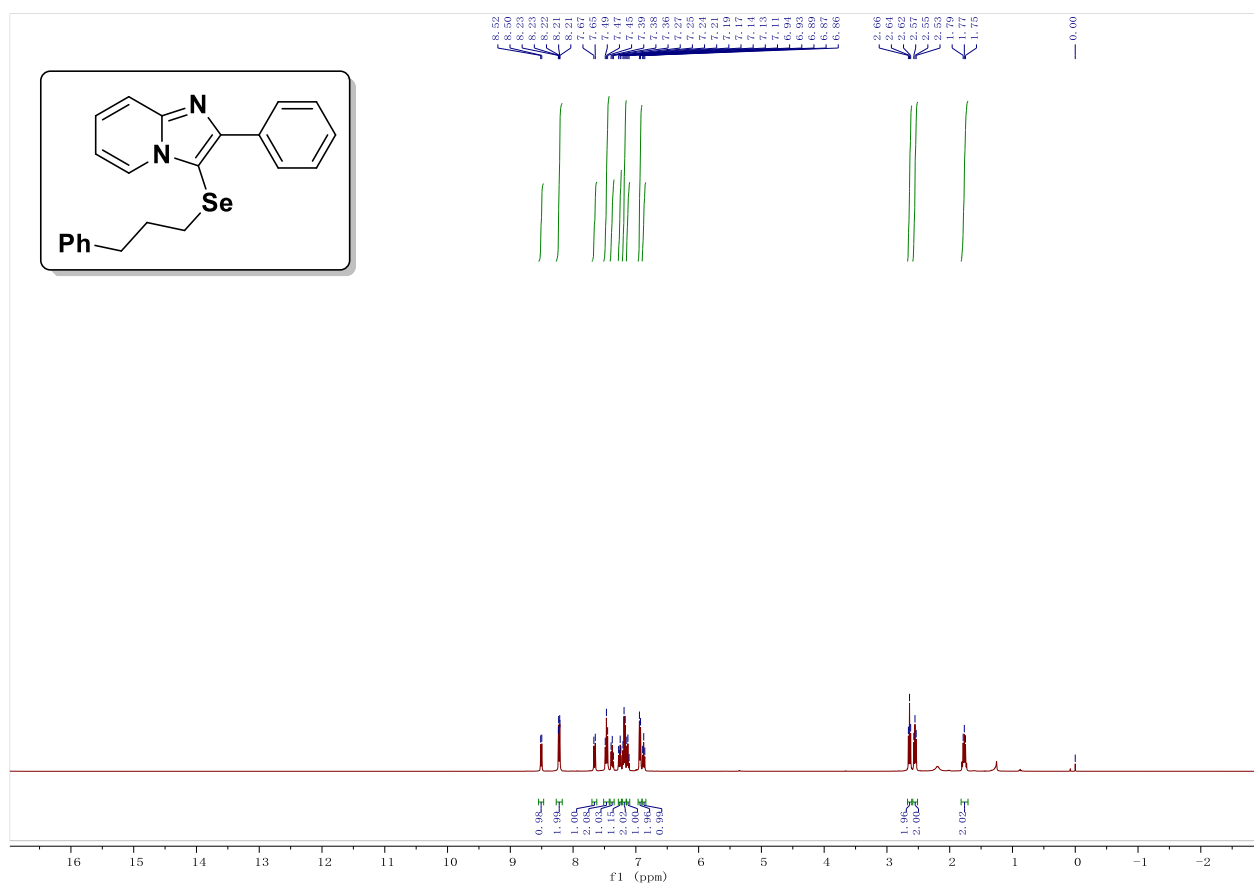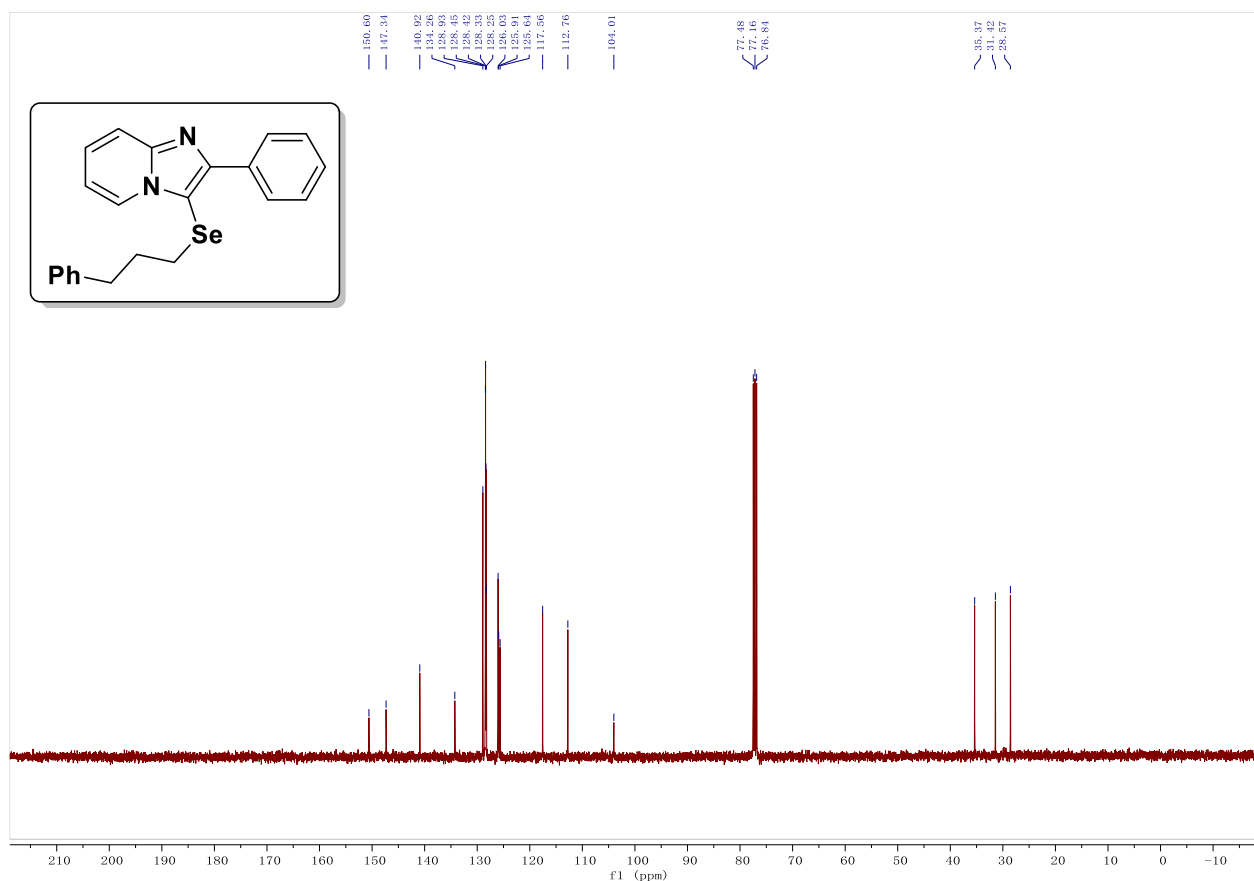

4p:

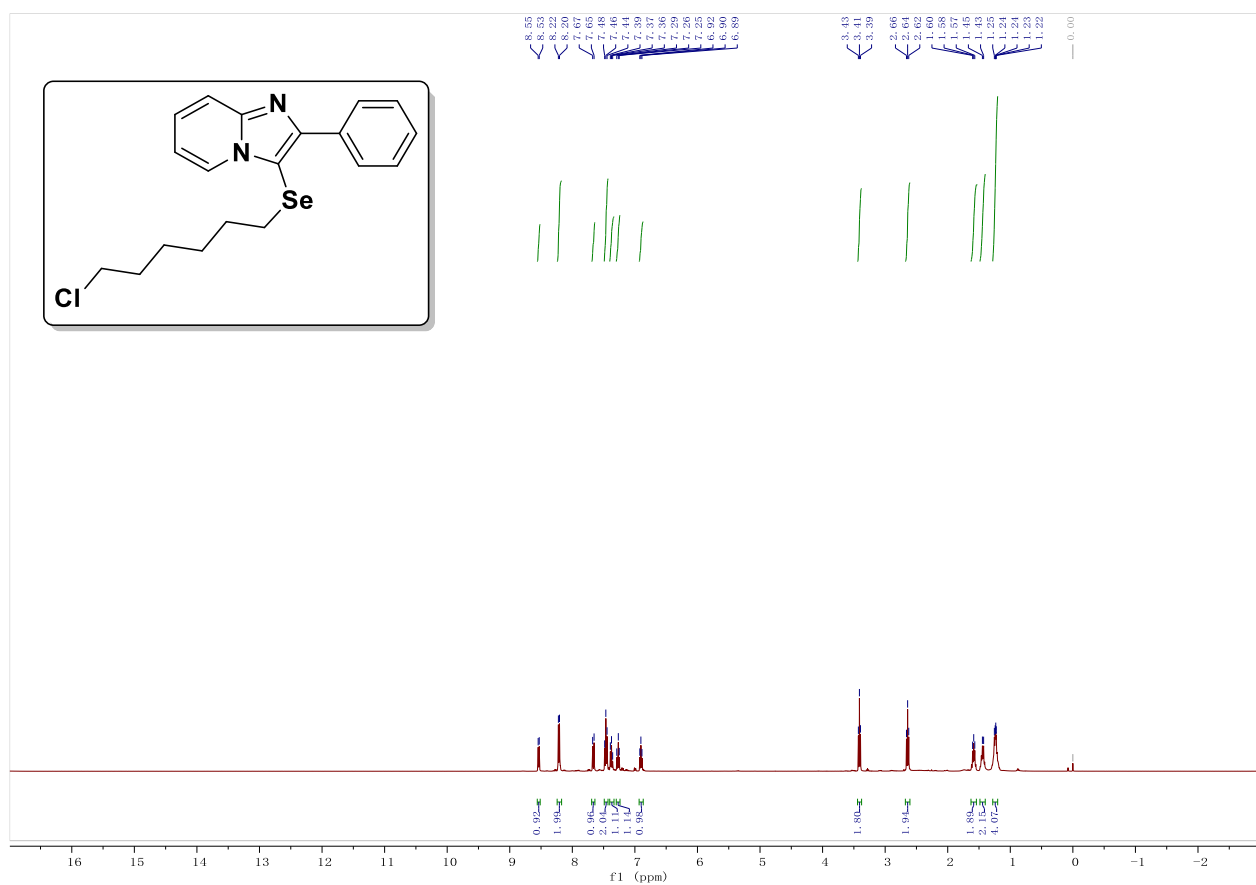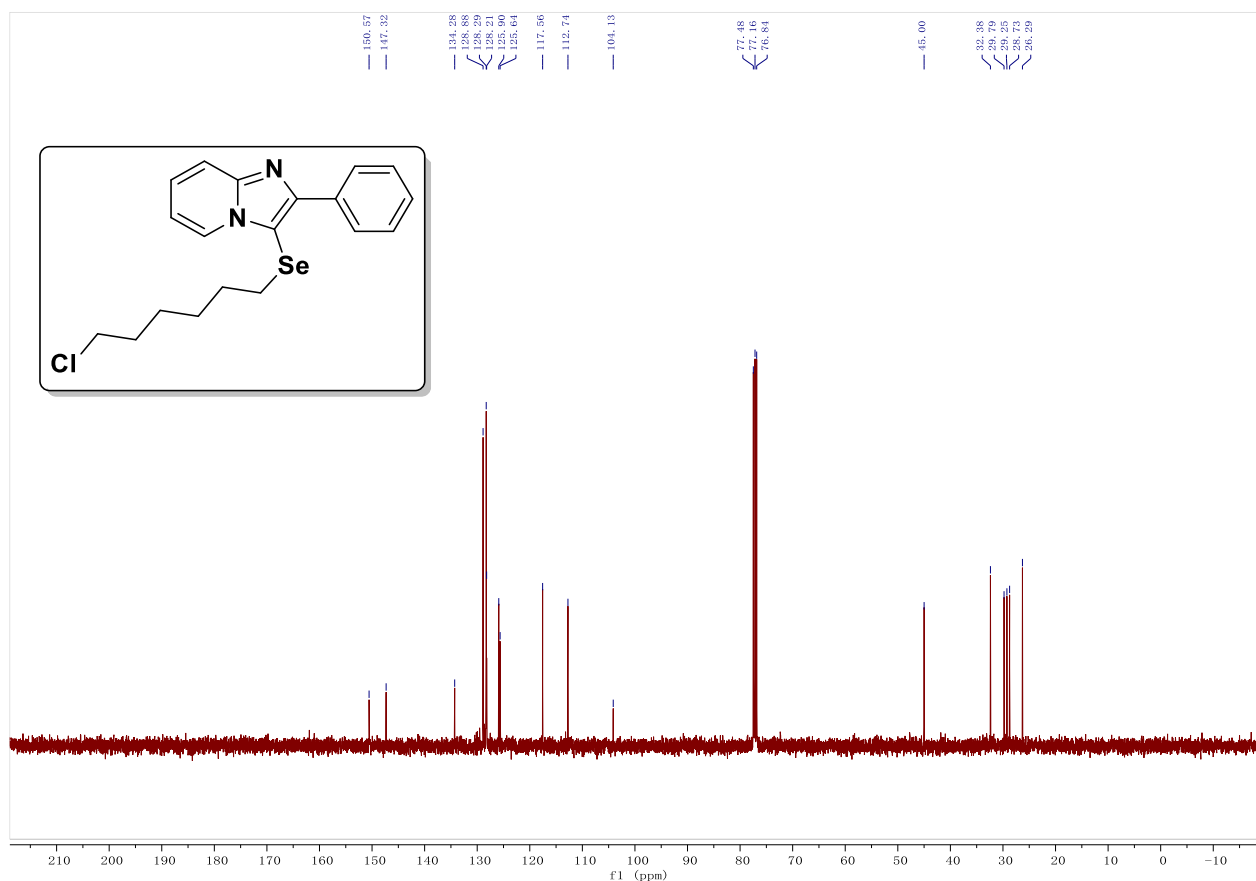

4q:

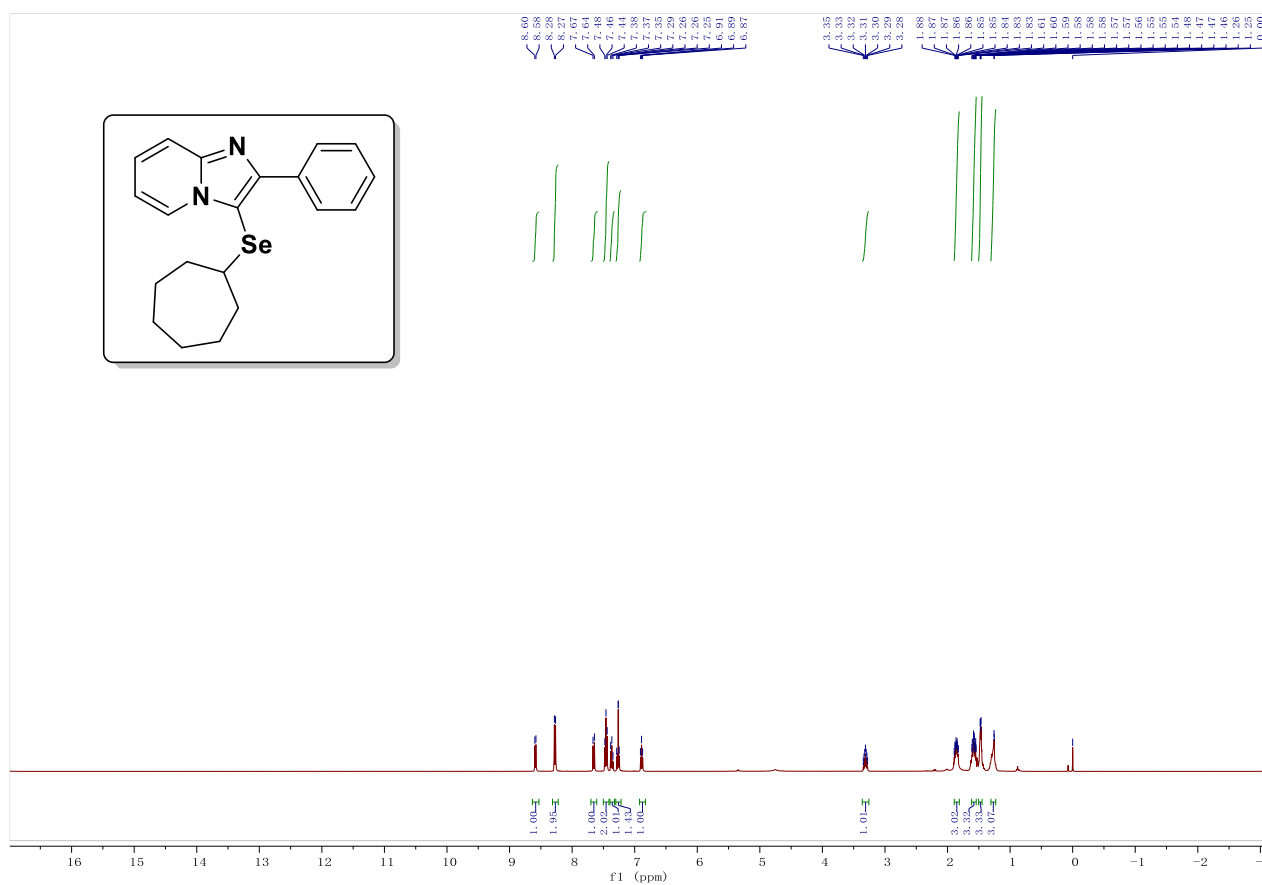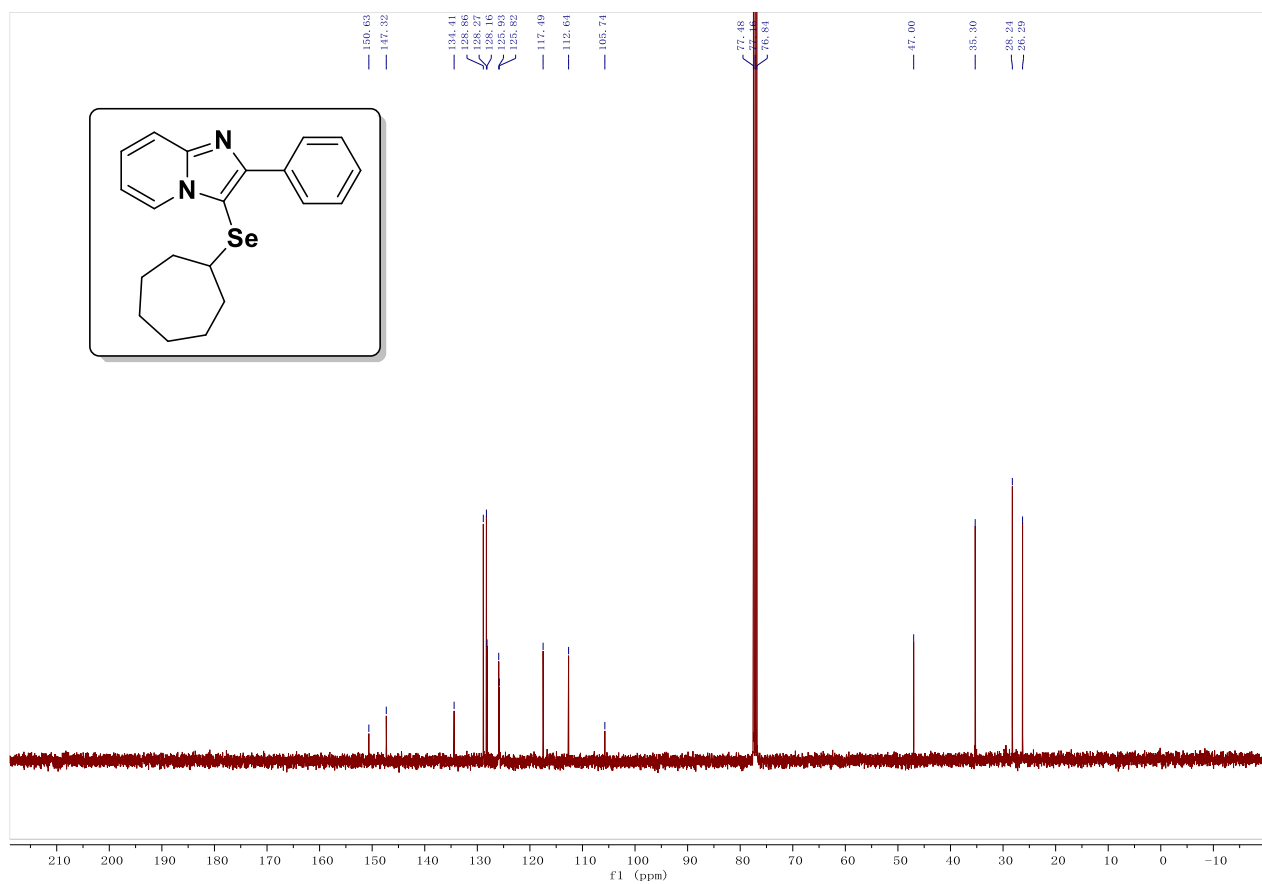

4r:

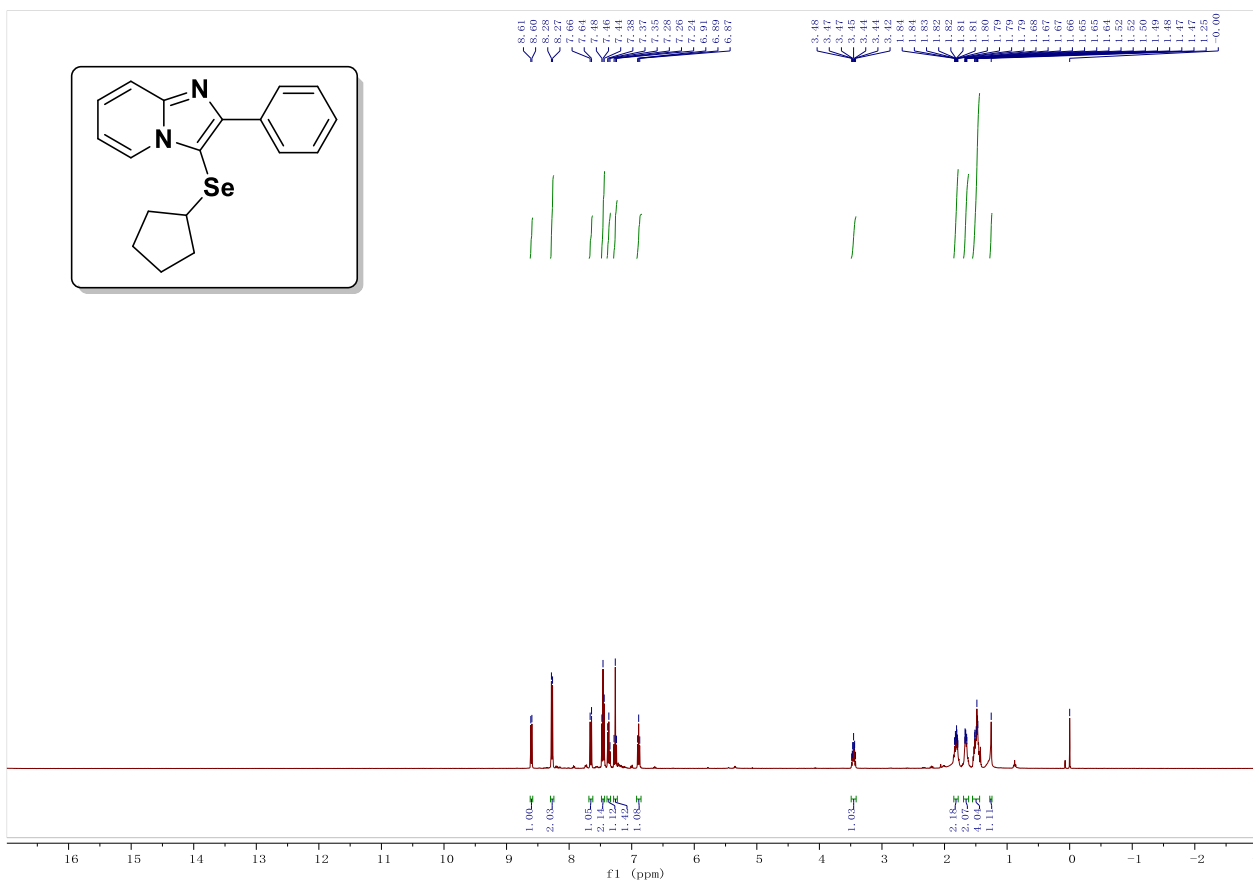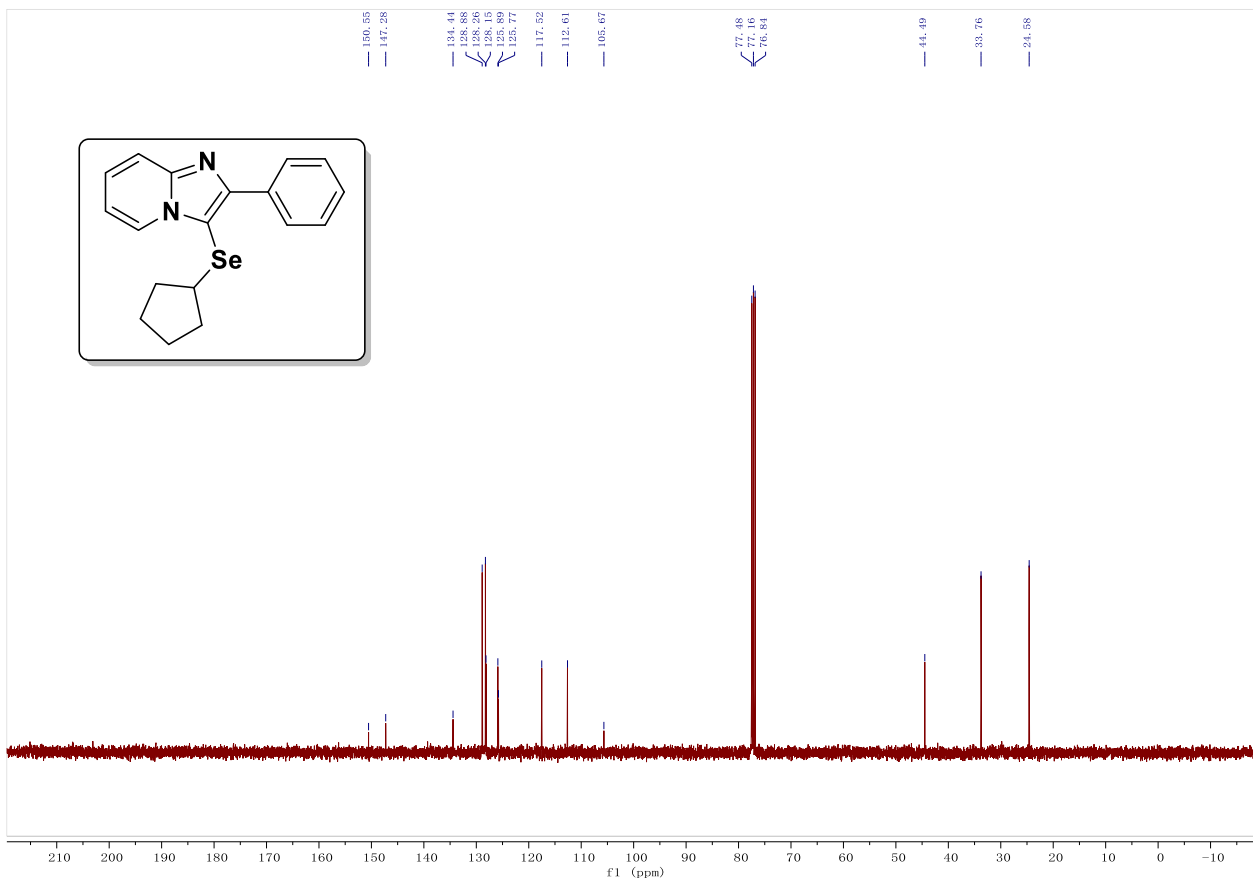

4s:

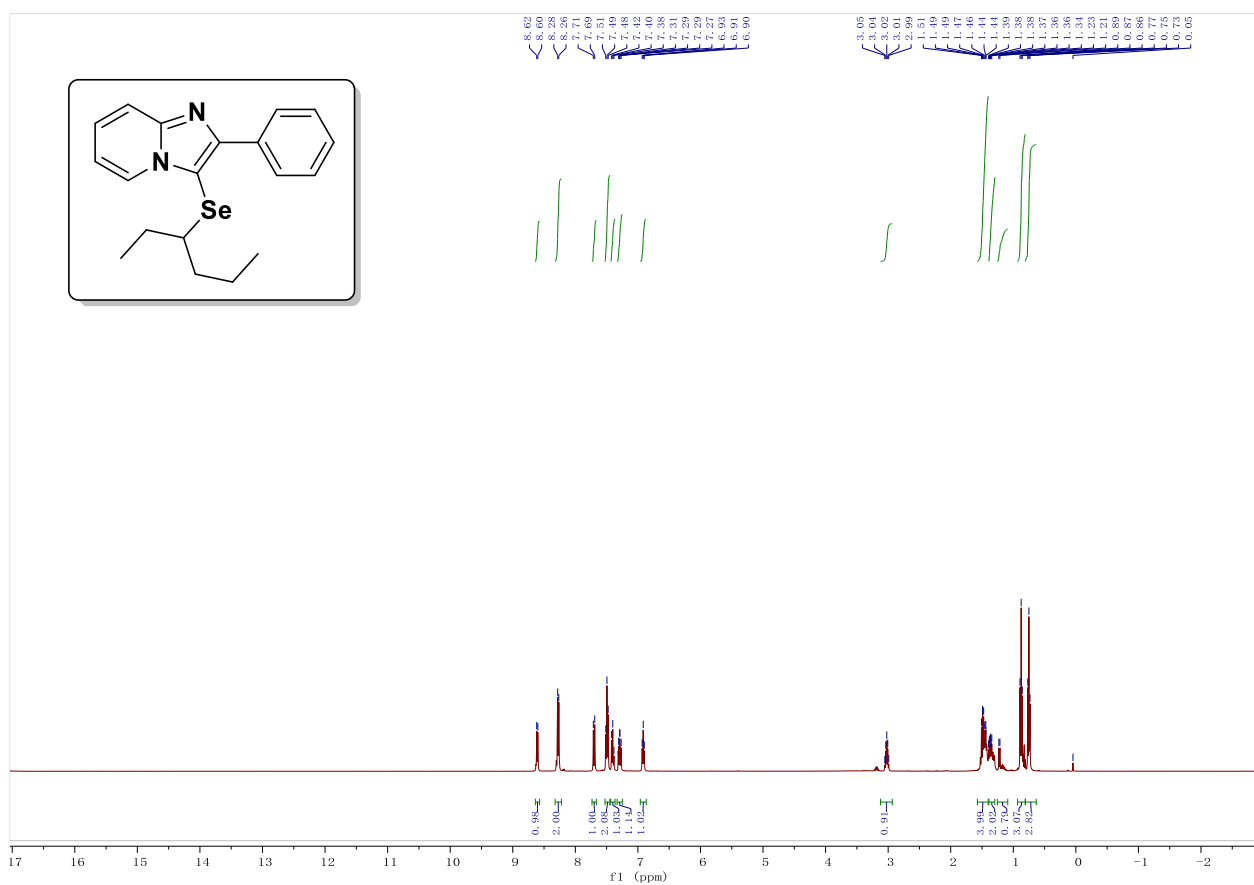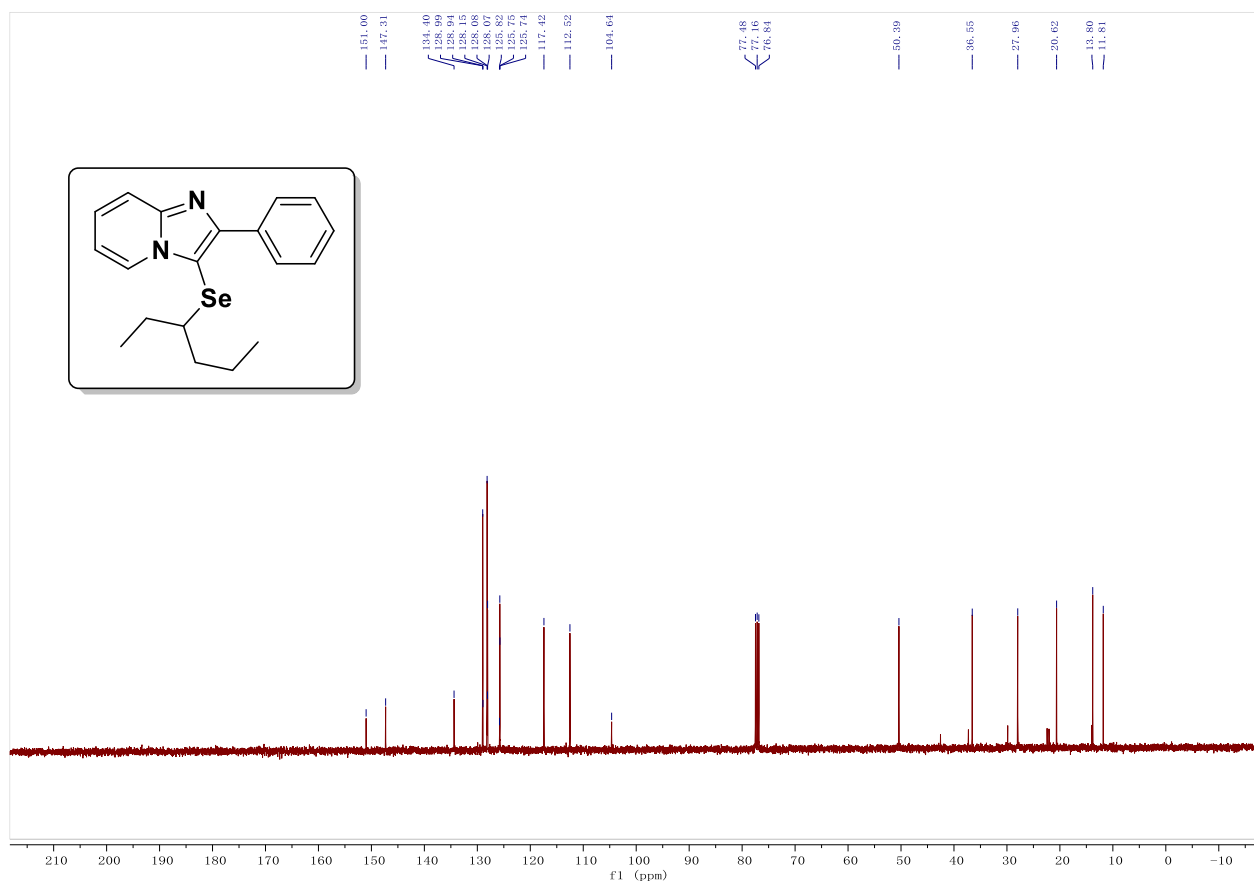

4t:

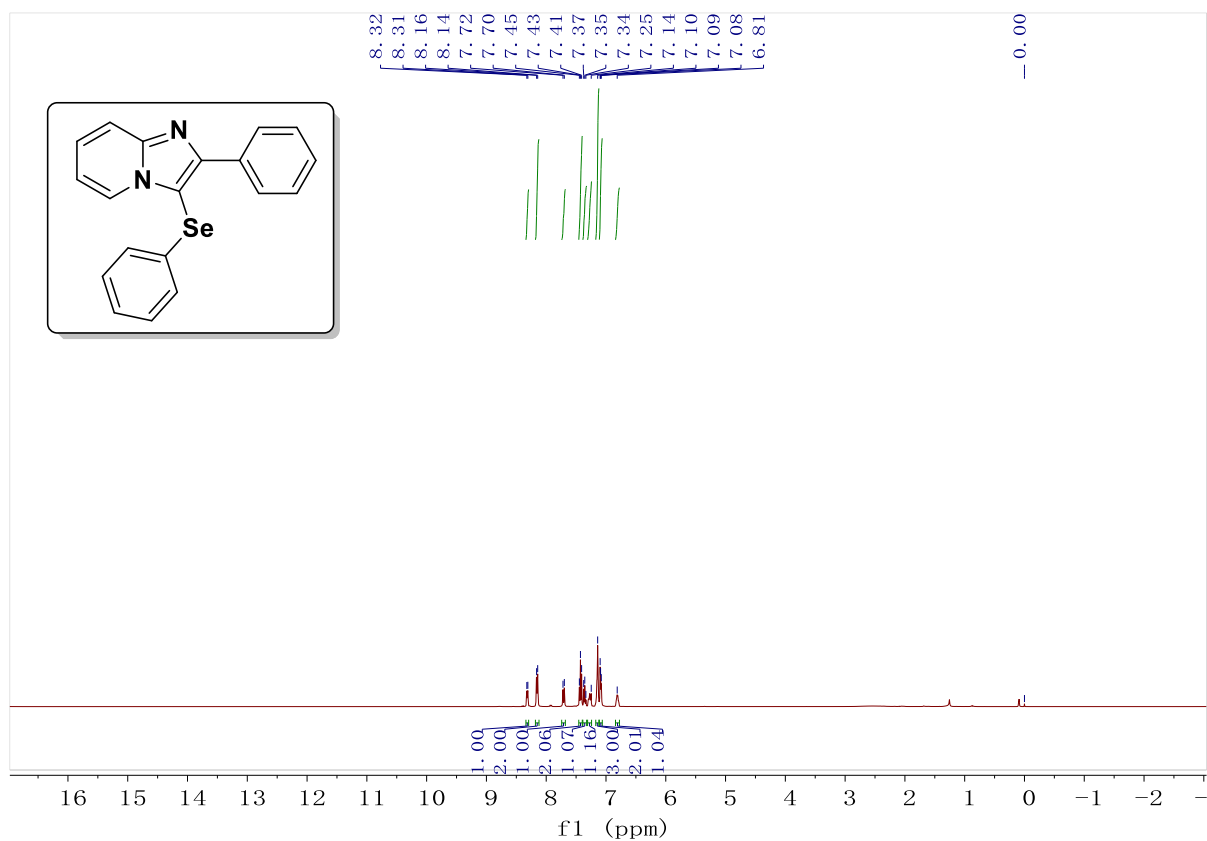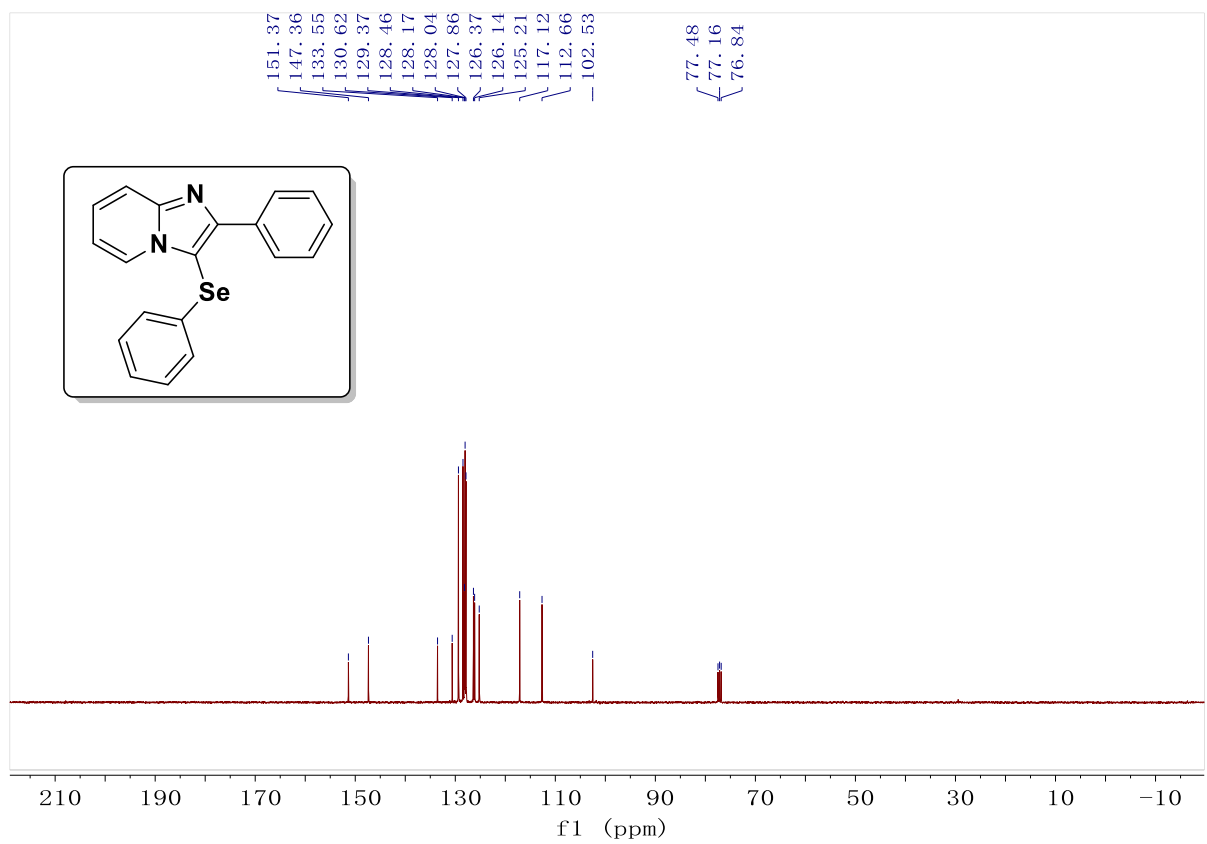

## Detail information of the purchased supplier of reagents

| Reagents                            | Supplier        |
|-------------------------------------|-----------------|
| 2-Bromoacetophenone                 | Macklin         |
| 2-Aminopyridine                     | Energy Chemical |
| iodine                              | Chemto          |
| Sodium hydrogen carbonate           | Yonghuachem     |
| 2-Bromo-4'-methylacetophenone       | Energy Chemical |
| 4-(Trifluoromethyl)phenacyl bromide | Energy Chemical |
| 4-Chloro-2'-bromoacetophenone       | Energy Chemical |
| 2-Bromo-4'-fluoroacetophenone       | Energy Chemical |
| 2-bromo-2'-methoxyacetophenone      | Energy Chemical |
| 2-Bromo-2'-chloroacetophenone       | Energy Chemical |
| 2-Bromo-3'-chloroacetophenone       | Energy Chemical |
| 4-Nitro-2'-bromoacetophenone        | Energy Chemical |
| 2-Amino-3-picoline                  | Energy Chemical |
| 2-Amino-5-methylpyridine            | Energy Chemical |
| 2-Amino-4-chloropyridine            | Energy Chemical |
| 5-(Trifluoromethyl)pyridin-2-amine  | Energy Chemical |
| 6-(Trifluoromethyl)pyridin-2-amine  | Energy Chemical |
| 4-Nitropyridin-2-amine              | Aladdin         |
| 2-Amino-5-cyanopyridine             | Macklin         |
| 2-Amino-6-methylpyridine            | Macklin         |
| 2-Amino-6-fluoropyridine            | Energy Chemical |
| DMF                                 | Energy Chemical |
| DMSO                                | Energy Chemical |
| DMA                                 | Energy Chemical |
| Ethanol                             | Energy Chemical |
| CuI                                 | Macklin         |
